# Supplementary material for: Hairstyle gender stereotypes and their impact on character evaluation in the Chinese context
Source: Research Square preprint supplement (doi:10.21203/rs.3.rs-6521886/v1), 2025-11-14

北京体育大学运动科学实验伦理审批表  
Ethics Approval Form for Sports Science Experiments of  
Beijing Sport University

编号 (No.) : 2025194H

|                            |                                                                                                                                                                                                                                                                                                                                                                                                                                      |                      |             |                      |                      |
|----------------------------|--------------------------------------------------------------------------------------------------------------------------------------------------------------------------------------------------------------------------------------------------------------------------------------------------------------------------------------------------------------------------------------------------------------------------------------|----------------------|-------------|----------------------|----------------------|
| 项目名称<br>Study Title        | 大学生发型性别刻板印象的性别差异                                                                                                                                                                                                                                                                                                                                                                                                                     |                      |             |                      |                      |
| 研究期限<br>Research Period    | 2025 年 4 月 1 日至 2025 年 5 月 1 日                                                                                                                                                                                                                                                                                                                                                                                                       |                      |             |                      |                      |
| 项目负责人<br>Project Manager   | 王莉                                                                                                                                                                                                                                                                                                                                                                                                                                   | 性别<br>Gender         | 女           | 职称<br>Academic Level | 副教授                  |
| 研究方向<br>Research Direction | 运动心理                                                                                                                                                                                                                                                                                                                                                                                                                                 | 联系方式<br>Phone Number | 13466754503 | 邮箱<br>E-mail         | wanglili0801@163.com |
| 申请节点<br>Application Node   | <input type="checkbox"/> 课题申报 <input checked="" type="checkbox"/> 课题开展 <input type="checkbox"/> 其他: _____                                                                                                                                                                                                                                                                                                                            |                      |             |                      |                      |
| 审查方式<br>Type of Review     | <input checked="" type="checkbox"/> 快速审查 Quick Review <input type="checkbox"/> 会议审查 Meeting Review <input type="checkbox"/> 紧急会议审查 Emergency Meeting Review                                                                                                                                                                                                                                                                          |                      |             |                      |                      |
| 审查依据<br>Basis of Review    | <input checked="" type="checkbox"/> 伦理审查申请书 Ethical review application<br><input checked="" type="checkbox"/> 试验方案 Research Proposal<br><input checked="" type="checkbox"/> 知情同意书 Informed Consent Form<br><input type="checkbox"/> 研究者简历 Curriculum Vitae of Project Manager<br><input type="checkbox"/> 安全措施及应急预案 Safety Measures and Emergency Plans<br>其他资料 Other Information _____<br>(其他资料包括: 试验用品安全性资料、生产企业资质证明、试验用品提供者的资质证明) |                      |             |                      |                      |
| 项目负责人<br>承诺<br>Commitment  | 以上所填内容均属实, 如获批准, 我将严格按照提供的方案进行研究, 并遵守北京体育大学运动科学实验伦理委员会的相关规定。<br>The above contents are true. If approved, I will conduct research in strict accordance with the provided programs and comply with the relevant regulations of Sports Science Experiment Ethics Committee of Beijing Sport University.<br>项目负责人签字 (Signature): 王莉                                                                                                     |                      |             |                      |                      |

地址: 北京市海淀区信息路 48 号 邮编: 100084 联系电话: 010-62989306  
Address: No. 48, Information Road, Haidian District, Beijing, China Post Code: 100084 Tel: 010-62989306

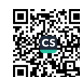

扫描全能王 创建

北京体育大学运动科学实验伦理委员会  
Sports Science Experiment Ethics Committee of Beijing Sport University

|                                                                                                                                                     |                                                                                                                                                                                                                                                                                                                                                                                                                                             |                                            |                                                                |
|-----------------------------------------------------------------------------------------------------------------------------------------------------|---------------------------------------------------------------------------------------------------------------------------------------------------------------------------------------------------------------------------------------------------------------------------------------------------------------------------------------------------------------------------------------------------------------------------------------------|--------------------------------------------|----------------------------------------------------------------|
| 审查结果<br>Review Result                                                                                                                               | <input checked="" type="checkbox"/> 同意<br>Approve                                                                                                                                                                                                                                                                                                                                                                                           | <input type="checkbox"/> 不同意<br>Disapprove | <input type="checkbox"/> 作必要修改后同意<br>Agreed After Modification |
| 审查结论<br>Evaluation                                                                                                                                  | <p>根据《大学生发型性别刻板印象的性别差异》的试验设计，经伦理委员会审查，受试者的健康、权利和隐私得到充分地保护，对受试者的潜在风险和伤害可控制到最小。同意开展研究。</p> <p>According to the trial design of " Hairstyle Gender Stereotypes and Their Impact on Character Evaluation in the Chinese Context ", after review by the ethics committee, the health, rights, and privacy of the subjects are fully protected, and the potential risks and harm to the subjects can be minimized. Agree to conduct research.</p> |                                            |                                                                |
| <p>伦理委员会签章：</p> <p>北京体育大学运动科学实验伦理委员会<br/>Sports Science Experiment Ethics Committee of Beijing Sport University</p> <p>日期 Date: 2025 年 4 月 21 日</p> |                                                                                                                                                                                                                                                                                                                                                                                                                                             |                                            |                                                                |

注：本审批表双面打印，一式一份，提交至伦理委员会签章。



Supplement: Supplementary file 1 [file Ethical approval for sports science experiments at Beijing Sport University.pdf › Supplementary materials/Ethical approval for sports science experiments at Beijing Sport University.pdf]
