# Supplementary material for: Hairstyle gender stereotypes and their impact on character evaluation in the Chinese context
Source: Research Square preprint supplement (doi:10.21203/rs.3.rs-6521886/v1), 2025-11-14
Supplement: Supplementary file 4 [file IAT D-value algorithm.xlsx]

## Sheet: Sheet1
被试昵称	Trials	key_resp_5/8.corr	key_resp_5/8.rt		正确率判断	筛错误反应	筛过快过慢		block4均值	block7均值	4-7均值	所有正确试次SD	D scores
zm53541	1				0				#DIV/0!	#DIV/0!	#DIV/0!	#DIV/0!	#DIV/0!
	2
	3
	4
	5
	6
	7
	8
	9
	10
	11
	12
	13
	14
	15
	16
	17
	18
	19
	20
	21
	22
	23
	24
	25
	26
	27
	28
	29
	30
	31
	32
	1
	2
	3
	4
	5
	6
	7
	8
	9
	10
	11
	12
	13
	14
	15
	16
	17
	18
	19
	20
	21
	22
	23
	24
	25
	26
	27
	28
	29
	30
	31
	32
