# Supplementary material for: Hairstyle gender stereotypes and their impact on character evaluation in the Chinese context
Source: Research Square preprint supplement (doi:10.21203/rs.3.rs-6521886/v1), 2025-11-14
Supplement: Supplementary file 5 [file Implicit results.xlsx]

## Sheet: Sheet1
编号	被试者昵称	2、请选择你的性别	3、您的年龄？（仅数字）		4、请选择你的教育程度？	5、请选择你是否是左撇子？	正确率	D值
1	刘记林来了	1	21	21	本科	否	1	0.946442		21
2	用户49098	1	21	21	本科	否	1	0.366435		21
3	用户49096	1	20	20	本科	否	1	1.10224		20
5	苏北	1	21	21	本科	否	1	0.779483		21
6	阿楠	1	20	20	本科	否	1	0.61253		20
9	留意zzz	1	20	20	本科	否	1	1.00264		20
10	寻思达	1	21	21	本科	否	1	1.16984		21
11	北语	1	22	22	本科	否	1	1.46746		22
13	kingsz	1	21	21	本科	否	1	1.28789		21
14	用户47666	1	22	22	本科	否	1	0.419656
15	牛牛牛	1	26	26	硕士	否	1	0.778891
17	中国少年	1	22	22	本科	否	1	0.902462
20	NPC123	1	20	20	本科	是	0.982143	1.38811
24	用户46922	1	22	22	本科	否	0.982143	1.00935
27	刘继林来了	1	20	20	本科	否	0.982143	0.268827
28	用户47850	1	28	28	本科	是	0.982143	-0.356297
31	用户34951	1	25	25	大专	否	0.982143	0.545816
35	胡钰	1	24	24	本科	否	0.982143	0.983976
38	用户47562	1	22	22	本科	否	0.964286	1.03946
39	用户48093	1	21	21	本科	否	0.964286	1.33961
40	用户49095	1	22	22	本科	否	0.964286	1.22988
42	用户47611	1	24	24	本科	否	0.964286	1.06267
46	好凉快	1	22	22	本科	否	0.964286	0.580346
48	用户47336	1	21	21	本科	否	0.964286	0.778156
53	用户46885	1	26	26	本科	否	0.946429	0.715999
54	王凯	1	24	24	本科	否	0.946429	0.973867
59	哇哈哈哈哈哈	1	21	21	本科	否	0.910714	0.392329
61	xzy	1	24	24	硕士	否	0.892857	0.439405
62	hhh..	1	22	22	本科	否	0.892857	0.73326
64	陈秋末	1	20	20	本科	是	0.821429	1.00549
4	贺贺	2	30	30	本科	否	1	0.651204
7	用户46793	2	25	25	本科	否	1	0.471525
8	十二月	2	20	20	本科	否	1	0.813054
12	颜小颜	2	22	22	本科	否	1	1.49944
16	梁淑萍	2	22	22	本科	否	1	1.05467
18	用户48050	2	20	20	本科	否	1	1.0409
19	木头欣	2	22	22	本科	否	1	1.09044
21	我们	2	26	26	硕士	否	0.982143	1.14202
22	花荚空空	2	23	23	本科	否	0.982143	1.27173
23	桔子1314	2	22	22	本科	否	0.982143	0.99844
25	用户45274	2	26	26	本科	否	0.982143	0.854342
26	冉冉子	2	26	26	本科	是	0.982143	1.00651
29	遗憾止于遗憾	2	22	22	本科	否	0.982143	0.368117
30	星xing	2	23	23	本科	否	0.982143	0.418073
32	AAA	2	22	22	本科	否	0.982143	1.05253
33	云淡风轻河南	2	22	22	大专	否	0.982143	1.04716
34	用户44221	2	20	20	本科	否	0.982143	0.94521
36	用户41078	2	28	28	硕士	否	0.964286	0.85844
37	ccc1	2	36	36	硕士	否	0.964286	0.98695
41	wjm	2	35	35	硕士	否	0.964286	0.846114
43	用户45505	2	23	23	本科	否	0.964286	0.869808
44	小林子	2	23	23	本科	否	0.964286	0.861471
45	雨落梧桐	2	20	20	本科	否	0.964286	1.08404
47	lnq	2	22	22	本科	否	0.964286	1.32164
49	用户49363	2	24	24	硕士	否	0.964286	0.799254
50	用户47072	2	23	23	本科	否	0.964286	1.1146
51	lvvvv	2	18	18	本科	否	0.964286	0.979878
52	吱呀	2	23	23	本科	否	0.946429	0.938928
55	彤彤彤彤彤	2	21	21	本科	否	0.946429	1.05536
56	肆柒	2	20	20	本科	否	0.928571	1.2059
57	谷刘娟	2	20	20	本科	否	0.928571	1.06972
58	ghgfhhyu1	2	25	25	本科	否	0.928571	0.362389
60	把酒温日月	2	22	22	本科	否	0.910714	0.947795
63	用户48667	2	21	21	本科	否	0.875	1.03055
				3.24267				0.891007

## Sheet: Sheet2
被试者昵称	2、请选择你的性别	3、您的年龄？（仅数字）	4、请选择你的教育程度？	5、请选择你是否是左撇子？	正确率	D值
NPC123	男	20	本科	是	0.982143	1.38811
用户41078	女	28	硕士	否	0.964286	0.85844
刘记林来了	男	21	本科	否	1	0.946442
用户49098	男	21	本科	否	1	0.366435
用户49096	男	20	本科	否	1	1.10224
贺贺	女	30	本科	否	1	0.651204
苏北	男	21	本科	否	1	0.779483
xzy	男	24	硕士	否	0.892857	0.439405
阿楠	男	20	本科	否	1	0.61253
ccc1	女	36	硕士	否	0.964286	0.98695
肆柒	女	20	本科	否	0.928571	1.2059
用户47562	男	22	本科	否	0.964286	1.03946
用户46793	女	25	本科	否	1	0.471525
我们	女	26	硕士	否	0.982143	1.14202
用户48093	男	21	本科	否	0.964286	1.33961
用户49095	男	22	本科	否	0.964286	1.22988
花荚空空	女	23	本科	否	0.982143	1.27173
十二月	女	20	本科	否	1	0.813054
桔子1314	女	22	本科	否	0.982143	0.99844
陈秋末	男	20	本科	是	0.821429	1.00549
用户46922	男	22	本科	否	0.982143	1.00935
wjm	女	35	硕士	否	0.964286	0.846114
用户47611	男	24	本科	否	0.964286	1.06267
留意zzz	男	20	本科	否	1	1.00264
寻思达	男	21	本科	否	1	1.16984
用户45505	女	23	本科	否	0.964286	0.869808
用户48667	女	21	本科	否	0.875	1.03055
吱呀	女	23	本科	否	0.946429	0.938928
北语	男	22	本科	否	1	1.46746
颜小颜	女	22	本科	否	1	1.49944
kingsz	男	21	本科	否	1	1.28789
用户45274	女	26	本科	否	0.982143	0.854342
冉冉子	女	26	本科	是	0.982143	1.00651
小林子	女	23	本科	否	0.964286	0.861471
雨落梧桐	女	20	本科	否	0.964286	1.08404
用户47666	男	22	本科	否	1	0.419656
刘继林来了	男	20	本科	否	0.982143	0.268827
用户47850	男	28	本科	是	0.982143	-0.356297
遗憾止于遗憾	女	22	本科	否	0.982143	0.368117
好凉快	男	22	本科	否	0.964286	0.580346
lnq	女	22	本科	否	0.964286	1.32164
星xing	女	23	本科	否	0.982143	0.418073
谷刘娟	女	20	本科	否	0.928571	1.06972
牛牛牛	男	26	硕士	否	1	0.778891
用户34951	男	25	大专	否	0.982143	0.545816
hhh..	男	22	本科	否	0.892857	0.73326
哇哈哈哈哈哈	男	21	本科	否	0.910714	0.392329
用户46885	男	26	本科	否	0.946429	0.715999
用户47336	男	21	本科	否	0.964286	0.778156
梁淑萍	女	22	本科	否	1	1.05467
把酒温日月	女	22	本科	否	0.910714	0.947795
用户49363	女	24	硕士	否	0.964286	0.799254
AAA	女	22	本科	否	0.982143	1.05253
ghgfhhyu1	女	25	本科	否	0.928571	0.362389
中国少年	男	22	本科	否	1	0.902462
用户47072	女	23	本科	否	0.964286	1.1146
王凯	男	24	本科	否	0.946429	0.973867
用户48050	女	20	本科	否	1	1.0409
彤彤彤彤彤	女	21	本科	否	0.946429	1.05536
云淡风轻河南	女	22	大专	否	0.982143	1.04716
lvvvv	女	18	本科	否	0.964286	0.979878
用户44221	女	20	本科	否	0.982143	0.94521
木头欣	女	22	本科	否	1	1.09044
胡钰	男	24	本科	否	0.982143	0.983976
