# Supplementary material for: Hairstyle gender stereotypes and their impact on character evaluation in the Chinese context
Source: Research Square preprint supplement (doi:10.21203/rs.3.rs-6521886/v1), 2025-11-14
Supplement: Supplementary file 6 [file Preliminary collation of implicit 2x2x2 data.xlsx]

## Sheet: Sheet1
						一致		不一致
序号	被试者昵称	2、请选择你的性别	3、您的年龄？（仅数字）	4、请选择你的教育程度？	5、请选择你是否是左撇子？	e-11-男男	e-22-女女	e-12-男女	i-21-女男
1	NPC123	1	20	本科	是	0.548046	0.56105	0.757071	0.737486
2	用户41078	2	28	硕士	否	0.491557	0.486593	0.707315	0.868115
3	刘记林来了	1	21	本科	否	0.536093	0.5447	0.61525	0.726114
4	用户49098	1	21	本科	否	0.539957	0.553207	0.542971	0.635371
5	用户49096	1	20	本科	否	0.491086	0.474929	0.650236	0.803343
6	贺贺	2	30	本科	否	0.501757	0.5247	0.573257	0.58485
7	苏北	1	21	本科	否	0.55805	0.634129	0.753593	0.814207
8	xzy	1	24	硕士	否	0.534117	0.503542	0.617962	0.551023
9	阿楠	1	20	本科	否	0.689024	0.709351	0.744493	0.919528
10	ccc1	2	36	硕士	否	0.664	0.650769	1.04266	1.16039
11	肆柒	2	20	本科	否	0.387362	0.392454	0.506607	0.564575
12	用户47562	1	22	本科	否	0.524385	0.5632	0.845679	0.745615
13	用户46793	2	25	本科	否	0.647993	0.696157	1.05227	0.760136
14	我们	2	26	硕士	否	0.619314	0.599693	0.973085	0.851207
15	用户48093	1	21	本科	否	0.606	0.540021	1.09216	1.14223
16	用户49095	1	22	本科	否	0.483943	0.495986	0.706367	0.663329
17	花荚空空	2	23	本科	否	0.537643	0.542	0.874214	0.806923
18	十二月	2	20	本科	否	0.749321	0.645929	0.797197	1.00357
19	桔子1314	2	22	本科	否	0.489929	0.4695	0.786385	0.723643
20	陈秋末	1	20	本科	是	0.539923	0.58275	0.850137	1.02754
21	用户46922	1	22	本科	否	0.508	0.450538	0.862643	0.839286
22	wjm	2	35	硕士	否	0.65625	0.610615	0.858546	0.971464
23	用户47611	1	24	本科	否	0.580864	0.525892	0.691731	0.991621
24	留意zzz	1	20	本科	否	0.4365	0.437779	0.6205	0.727486
25	寻思达	1	21	本科	否	0.51935	0.500086	0.775679	0.665714
26	用户45505	2	23	本科	否	0.5268	0.576746	0.681436	0.858721
27	用户48667	2	21	本科	否	0.533831	0.52175	1.15469	0.954217
28	吱呀	2	23	本科	否	0.639557	0.575246	0.957562	0.966262
29	北语	1	22	本科	否	0.482286	0.463571	0.743621	0.691121
30	颜小颜	2	22	本科	否	0.550591	0.56485	0.842424	0.876195
31	kingsz	1	21	本科	否	0.649621	0.605764	0.942457	1.1295
32	用户45274	2	26	本科	否	0.524369	0.489507	0.8383	0.759421
33	冉冉子	2	26	本科	是	0.512093	0.541964	0.729754	0.654986
34	小林子	2	23	本科	否	0.5503	0.502514	0.649577	0.779008
35	雨落梧桐	2	20	本科	否	0.546671	0.550092	0.948208	0.974736
36	用户47666	1	22	本科	否	0.60045	0.591321	0.615843	0.697457
37	刘继林来了	1	20	本科	否	0.977521	1.02814	0.904	1.39335
39	遗憾止于遗憾	2	22	本科	否	0.524031	0.486121	0.574343	0.776157
40	好凉快	1	22	本科	否	0.557549	0.519192	0.523808	0.831629
41	lnq	2	22	本科	否	0.500231	0.496029	0.843314	0.803792
42	星xing	2	23	本科	否	0.581571	0.695714	0.752357	0.708846
43	谷刘娟	2	20	本科	否	0.545569	0.587831	0.868033	1.44921
44	牛牛牛	1	26	硕士	否	0.56875	0.503879	0.893279	1.13396
45	用户34951	1	25	大专	否	0.497507	0.437607	0.57535	0.509515
46	hhh..	1	22	本科	否	0.596569	0.566446	0.818691	0.7066
47	哇哈哈哈哈哈	1	21	本科	否	0.491169	0.526962	0.598677	0.512242
48	用户46885	1	26	本科	否	0.524914	0.521408	0.680223	0.891277
49	用户47336	1	21	本科	否	0.556257	0.639958	0.797757	0.973237
50	梁淑萍	2	22	本科	否	0.569002	0.554295	0.708851	0.814289
51	把酒温日月	2	22	本科	否	0.509142	0.505658	1.02615	1.02218
52	用户49363	2	24	硕士	否	0.523829	0.537686	0.790462	0.942715
53	AAA	2	22	本科	否	0.55365	0.548786	0.924669	1.00027
54	ghgfhhyu1	2	25	本科	否	0.688229	0.607515	0.708945	0.908229
55	中国少年	1	22	本科	否	0.5276	0.501943	0.590871	0.647514
56	用户47072	2	23	本科	否	0.616392	0.541029	0.735007	0.775686
57	王凯	1	24	本科	否	0.613329	0.660477	0.956946	0.965992
58	用户48050	2	20	本科	否	0.563564	0.562107	0.740736	0.797221
59	彤彤彤彤彤	2	21	本科	否	0.616302	0.505036	0.852138	0.945286
60	云淡风轻河南	2	22	大专	否	0.521146	0.478764	0.597586	0.629829
61	lvvvv	2	18	本科	否	0.559621	0.557457	0.947523	0.845423
62	用户44221	2	20	本科	否	0.451215	0.455321	0.488336	0.581621
63	木头欣	2	22	本科	否	0.445121	0.482436	0.534721	0.591557
64	胡钰	1	24	本科	否	0.497846	0.498643	0.665429	0.613214
