# Supplementary material for: Hairstyle gender stereotypes and their impact on character evaluation in the Chinese context
Source: Research Square preprint supplement (doi:10.21203/rs.3.rs-6521886/v1), 2025-11-14
Supplement: Supplementary file 7 [file IAT D-value algorithm.xlsx]

## Sheet: Sheet1
被试昵称	Trials	key_resp_5/8.corr	key_resp_5/8.rt		正确率判断	筛错误反应	筛过快过慢		block4均值	block7均值	4-7均值	所有正确试次SD	D scores
zm53541	1	0	1.0875		0.878788				1.19931	0.830927	-0.368384	0.484678	-0.760059
	2	1	1.5938			1.5938	1.5938
	3	1	2.3133			2.3133	2.3133
	4	1	2.0729			2.0729	2.0729
	5	1	0.9171			0.9171	0.9171
	6	1	0.9563			0.9563	0.9563
	7	1	0.9768			0.9768	0.9768
	8	0	0.9306
	9	1	2.5661			2.5661	2.5661
	10	1	1.2689			1.2689	1.2689
	11	1	1.0319			1.0319	1.0319
	12	1	2.374			2.374	2.374
	13	1	1.1902			1.1902	1.1902
	14	1	0.6981			0.6981	0.6981
	15	1	0.7307			0.7307	0.7307
	16	1	0.9981			0.9981	0.9981
	17	1	0.9504			0.9504	0.9504
	18	1	0.9212			0.9212	0.9212
	19	0	1.0321
	20	1	1.0839			1.0839	1.0839
	21	1	0.7169			0.7169	0.7169
	22	1	0.6473			0.6473	0.6473
	23	1	0.567			0.567	0.567
	24	1	1.1014			1.1014	1.1014
	25	1	0.5654			0.5654	0.5654
	26	1	0.6706			0.6706	0.6706
	27	1	1.323			1.323	1.323
	28	1	0.8708			0.8708	0.8708
	29	1	0.6336			0.6336	0.6336
	30	0	0.7334
	31	1	1.8741			1.8741	1.8741
	32	1	1.9669			1.9669	1.9669
	1	1	0.798			0.798	0.798
	2	0	1.0838
	3	1	1.4147			1.4147	1.4147
	4	1	0.6989			0.6989	0.6989
	5	1	0.947			0.947	0.947
	6	1	1.9365			1.9365	1.9365
	7	1	0.6896			0.6896	0.6896
	8	1	1.2735			1.2735	1.2735
	9	1	0.65			0.65	0.65
	10	1	0.849			0.849	0.849
	11	1	0.6525			0.6525	0.6525
	12	1	0.8437			0.8437	0.8437
	13	1	0.6369			0.6369	0.6369
	14	1	0.6515			0.6515	0.6515
	15	1	0.7981			0.7981	0.7981
	16	1	0.9146			0.9146	0.9146
	17	1	0.5621			0.5621	0.5621
	18	1	0.823			0.823	0.823
	19	1	0.6825			0.6825	0.6825
	20	0	1.0975
	21	1	0.8978			0.8978	0.8978
	22	1	0.8933			0.8933	0.8933
	23	1	0.8168			0.8168	0.8168
	24	1	0.8187			0.8187	0.8187
	25	1	0.6503			0.6503	0.6503
	26	1	0.6609			0.6609	0.6609
	27	1	0.6524			0.6524	0.6524
	28	1	0.9244			0.9244	0.9244
	29	1	0.6904			0.6904	0.6904
	30	1	0.7531			0.7531	0.7531
	31	1	0.5832			0.5832	0.5832
	32	1	0.7644			0.7644	0.7644
