# Supplementary material for: Hairstyle gender stereotypes and their impact on character evaluation in the Chinese context
Source: Research Square preprint supplement (doi:10.21203/rs.3.rs-6521886/v1), 2025-11-14
Supplement: Supplementary file 8 [file Implicit Experiment 2 Data.xlsx]

## Sheet: 总表
用户48784	男	21	21
牛牛牛	男	26	26
lh	男	22	22
阿楠	男	20	20
用户50412	男	20	20
用户49111	男	21	21
用户47182	男	22	22
用户46004	男	23	23
用户47001	男	21	21
用户50132	男	20	20
惠风龢畅	男	23	23
用户47628	男	20	20
用户48410	男	36	36
想要见光	男	21	21
孙宇涵	男	19	19
用户30686	男	28	28
aiyaya	男	31	31
文星	男	19	19
用户49976	男	22	22
华子	男	38	38
刘记林来了	男	20	20
用户50107	男	22	22
唠唠兔	男	22	22
刘继林来了	男	21	21
天蝎小龙虾	男	30	30
华子	男	38	38
lh	男	22	22
用户48410	男	32	32
牛牛牛	男	26	26
用户46004	男	23	23
惠风龢畅	男	23	23
用户47336	男	21	21
唠唠兔	男	22	22
文星	男	19	19
刘记林来了	男	21	21
用户47001	男	21	21
闲人野鹤	男	21	21
用户38741	男	40	40
用户50042	男	22	22
木以欣欣向荣	男	23	23
用户50430	男	21	21
梁淑萍	女	22	22
用户45505	女	23	23
用户50427	女	22	22
cjm	女	21	21
用户39356	女	21	21
Le	女	23	23
爱意	女	31	31
总被男人钓	女	20	20
国建华	女	23	23
村口大铁牛	女	23	23
星xing	女	23	23
十一点半睡觉	女	21	21
用户41281	女	25	25
木头欣	女	22	22
zy。	女	21	21
A_LXY_88	女	20	20
隐	女	22	22
好艰难	女	34	34
淇淇最帅	女	27	27
qzzziiii	女	23	23
放羊老妪	女	22	22
用户43055	女	31	31
用户50087	女	22	22
椰子爱吃糖	女	39	39
Yoyo888	女	40	40
Echo0963	女	23	23
用户40954	女	19	19
用户43154	女	22	22
云淡风轻河南	女	22	22
认真填问卷，感谢nd	女	22	22
薛415	女	24	24
用户47229	女	24	24
用户48826	女	20	20
用户39727	女	20	20
用户48729	女	28	28
用户29645	女	25	25
hercycc	女	24	24
用户48435	女	23	23
用户43513	女	20	20
红小胖	女	23	23
1LIN1	女	22	22
星xing	女	23	23
阿拉雷	女	22	22
用户49655	女	25	25
易笙	女	23	23
好艰难	女	34	34
雨落梧桐	女	20	20
欣欣啊	女	21	21
用户44584	女	22	22
用户48171	女	22	22
cjm	女	21	21
Yoyo888	女	40	40
Le	女	23	23
梁淑萍	女	22	22
用户41281	女	25	25
记得带耳机哦	女	23	23
村口大铁牛	女	23	23
云淡风轻河南	女	22	22
木头欣	女	22	22
卡布奇洛	女	24	24
椰子爱吃糖	女	40	40
qzzziiii	女	23	23
zy。	女	21	21
用户43154	女	22	22
认真填问卷，感谢nd	女	23	23
用户48577	女	19	19
用户41054	女	22	22
黑天	女	24	24
用户48435	女	23	23
用户46719	女	34	34
用户47280	女	22	22
智艳	女	35	35
果子dd	女	19	19
收集金豆豆	女	20	20
用户44344	女	26	26
不会搁浅的鲨不是好傻	女	24	24
用户47590	女	26	26
用户46793	女	20	20
心如止水	女	30	30
运	女	23	23
用户47188	女	28	28
鲜花	女	35	35
用户48481	女	19	19
用户45037	女	23	23

## Sheet: 男性对象原始表
序号	用户ID	被试者记录ID	被试者昵称	2、请选择你的性别	3、您的年龄？（仅数字）	4、请选择你的教育程度？	5、请选择你是否是左撇子？	正确率	D值
1	690525465995116544	825342510955237378	梁淑萍	女	22	本科	否	1	0.517375
2	806196485808070658	825342511139659778	用户45505	女	23	本科	否	0.954545	0.733402
3	825306535407263746	825342755210530817	用户50427	女	22	本科	否	0.954545	0.701598
4	818178645230231553	825343076888354818	用户48784	男	21	本科	否	0.742424
5	647190664760524800	825343183583059970	cjm	女	21	本科	否	0.939394	0.579049
6	774190846450077698	825343317448466434	用户39356	女	21	本科	否	0.969697	0.118103
7	655486449319149568	825344456588005378	Le	女	23	本科	否	0.984848	0.372813
8	808799150652137474	825345052200144897	爱意	女	31	本科	否	0.878788	0.134063
9	609509373282091008	825345103148228610	牛牛牛	男	26	硕士	否	0.954545	0.0965591
10	823206396706299906	825345319154884609	总被男人钓	女	20	本科	否	0.954545	-0.0959803
11	699559388309880832	825345331041669122	lh	男	22	硕士	否	0.939394	0.957498
12	814593943290388482	825345362511532034	国建华	女	23	本科	否	0.833333	0.207754
13	562214616889819136	825345369759162369	村口大铁牛	女	23	本科	否	0.939394	-0.577628
14	802485898393559042	825345529356623874	星xing	女	23	本科	否	0.939394	-0.239294
15	784384274496491522	825345704594771969	阿楠	男	20	本科	否	0.984848	0.25375
16	815231779131760642	825346106195058689	十一点半睡觉	女	21	本科	否	0.924242	0.191916
17	786592151617409026	825346208192270338	用户41281	女	25	硕士	否	1	-0.0501693
18	675059027545161728	825346358553747458	木头欣	女	22	本科	否	0.969697	0.122103
19	811326671591448577	825346582001098754	zy。	女	21	本科	否	0.984848	-0.11488
20	623927491781722112	825346618806116354	A_LXY_88	女	20	本科	否	0.954545	-0.614297
21	825137713463304194	825346621226229762	用户50412	男	20	本科	否	0.984848	0.0386505
22	819325705870516226	825346895797952514	用户49111	男	21	本科	否	0.969697	0.0553495
23	813212243926851585	825347373193760769	用户47182	男	22	本科	否	0.954545	0.86867
24	808095621021048833	825347406446075905	用户46004	男	23	本科	否	0.969697	0.430827
25	812716411930681345	825347853068275714	用户47001	男	21	本科	否	0.984848	0.190377
26	823939328853024769	825347910047768577	用户50132	男	20	本科	否	0.969697	0.640992
27	809540521402966018	825347945762394113	隐	女	22	本科	否	0.969697	-0.604807
28	820968896726179841	825348182228738049	好艰难	女	34	本科	否	0.984848	0.86003
29	763702761719336961	825348452006498305	淇淇最帅	女	27	本科	否	0.984848	0.306862
30	672532867649110016	825348645376368641	qzzziiii	女	23	硕士	否	0.984848	0.479031
31	680051628862078976	825349133752737794	惠风龢畅	男	23	本科	否	0.848485	0.23389
32	701370990290010112	825349164857696258	放羊老妪	女	22	本科	否	0.969697	0.53568
33	816390379342536706	825349767608668161	用户47628	男	20	本科	否	0.893939	0.689348
34	795667507930341377	825349861653352449	用户43055	女	31	本科	否	0.969697	0.152924
35	823545225829031937	825349988845494274	用户50087	女	22	本科	否	0.818182	-0.0929753
36	817772670216183810	825349995531341826	用户48410	男	36	本科	否	0.939394	0.350781
37	672528135719223296	825350197688279041	椰子爱吃糖	女	39	大专	否	0.984848	0.36623
38	673536821732311040	825350326935756802	Yoyo888	女	40	本科	否	0.969697	0.532144
39	787283836840185858	825350744982036481	Echo0963	女	23	本科	否	0.969697	0.614669
40	786312908387913730	825351031377629186	想要见光	男	21	本科	否	0.954545	-0.14988
41	784184343513010177	825351994419060738	用户40954	女	19	本科	否	0.924242	0.418385
42	796700428791324674	825352530929389569	用户43154	女	22	硕士	否	0.954545	0.630974
43	764077949963210754	825353213673873409	孙宇涵	男	19	本科	否	0.893939	-0.163181
44	674176335228174336	825353245391200257	云淡风轻河南	女	22	大专	否	0.954545	0.494889
45	782180131438596097	825353357324591106	认真填问卷，感谢nd	女	22	硕士	否	0.893939	0.760399
46	733820079237763073	825353562463932417	用户30686	男	28	硕士	否	1	0.579268
47	799769861201993730	825354030229491713	薛415	女	24	硕士	否	0.954545	0.869643
48	813554123508162562	825354318449352705	用户47229	女	24	本科	否	0.727273
49	818441284195852289	825354403937783810	用户48826	女	20	本科	否	0.954545	0.180809
50	820384111251300354	825354467829616641	aiyaya	男	31	本科	否	0.954545	0.37152
51	776002406046765058	825354785921310721	用户39727	女	20	本科	否	0.939394	0.0284735
52	807193813448794114	825355225333374978	文星	男	19	本科	否	0.787879	-0.0477211
53	822841954890031105	825355670407749633	用户49976	男	22	本科	否	0.80303	0.402386
54	818086362468196353	825355774464237570	用户48729	女	28	本科	否	0.954545	-0.0858095
55	730025585505734658	825356618370785281	用户29645	女	25	本科	否	0.924242	0.425268
56	572019219441385472	825357106935898113	hercycc	女	24	硕士	否	0.969697	0.664943
57	702925565472014336	825357125772644354	华子	男	38	中专	否	0.954545	-0.670356
58	817773753256779777	825357591373942785	用户48435	女	23	硕士	否	0.984848	0.949604
59	726389101590216704	825357618460758017	刘记林来了	男	20	本科	否	0.969697	-0.568433
60	799384714044645377	825358232464793602	用户43513	女	20	本科	否	0.924242	0.293095
61	823602085667938306	825358533959880706	用户50107	男	22	本科	否	0.818182	0.372318
62	571361781235056640	825360353377525762	红小胖	女	23	本科	否	0.969697	0.855952
63	673561434503774208	825360618315059201	唠唠兔	男	22	本科	否	1	0.390279
64	646073645839417344	825362605207195649	1LIN1	女	22	本科	否	0.924242	-0.358427

## Sheet: 女性对象原始表
序号	用户ID	被试者记录ID	被试者昵称	2、请选择你的性别	3、您的年龄？（仅数字）	4、请选择你的教育程度？	5、请选择你是否是左撇子？	正确率	D值
1	802485898393559042	825342059614445569	星xing	女	23	本科	否	0.909091	0.52721			0.52721
2	811263334014918657	825342152971264001	阿拉雷	女	22	本科	否	0.984848	0.0611997			0.0611997
3	821762231938195457	825342238497316866	用户49655	女	25	本科	否	0.939394	-0.444404			-0.444404
4	772056166992973826	825342251436871682	易笙	女	23	本科	否	1	-0.0734515			-0.0734515
5	820968896726179841	825342279559680001	好艰难	女	34	本科	否	0.984848	0.0190376			0.0190376
6	726386042323599360	825342356596461569	刘继林来了	男	21	本科	否	0.969697	0.116662			0.116662
7	801811764370087937	825342851847168002	雨落梧桐	女	20	本科	否	0.69697				0.129074
8	768804353862799361	825344328909197313	欣欣啊	女	21	本科	否	0.969697	0.129074			-0.755352
9	735065258095546369	825344641321803777	天蝎小龙虾	男	30	硕士	是	0.909091	-0.755352			0.663525
10	804020891741724673	825345022823239682	用户44584	女	22	本科	否	0.818182	0.663525			0.351098
11	817680286941847554	825345076170592257	用户48171	女	22	本科	否	0.909091	0.351098			0.367288
12	702925565472014336	825345195334963201	华子	男	38	中专	否	0.939394	0.367288			-0.404834
13	647190664760524800	825345259969187841	cjm	女	21	本科	否	0.909091	-0.404834			-0.760059
14	673536821732311040	825345839793967105	Yoyo888	女	40	本科	否	0.878788	-0.760059			0.0334887
15	655486449319149568	825347156729925633	Le	女	23	本科	否	0.954545	0.0334887			0.764241
16	699559388309880832	825347330264932353	lh	男	22	硕士	否	0.909091	0.764241			0.859498
17	817772670216183810	825347387466977281	用户48410	男	32	本科	否	1	0.859498			-0.430072
18	609509373282091008	825348129313398785	牛牛牛	男	26	硕士	否	0.954545	-0.430072			0.370735
19	690525465995116544	825348185026338817	梁淑萍	女	22	本科	否	0.984848	0.370735			0.0125308
20	786592151617409026	825348546952830977	用户41281	女	25	硕士	否	0.984848	0.0125308			-0.835474
21	808095621021048833	825349773128372225	用户46004	男	23	本科	否	0.969697	-0.835474			0.422372
22	730803699089412097	825349826396033025	记得带耳机哦	女	23	本科	否	0.984848	0.422372			-0.102945
23	562214616889819136	825350411312570369	村口大铁牛	女	23	本科	否	0.954545	-0.102945			0.0724599
24	674176335228174336	825350446242734082	云淡风轻河南	女	22	大专	否	0.969697	0.0724599			-0.28493
25	675059027545161728	825350649679060993	木头欣	女	22	本科	否	0.984848	-0.28493			-0.406652
26	634786876431007744	825350659531608065	卡布奇洛	女	24	本科	否	1	-0.406652			-0.157969
27	680051628862078976	825352201148043265	惠风龢畅	男	23	本科	否	0.878788	-0.157969			0.403531
28	672528135719223296	825352413073641473	椰子爱吃糖	女	40	大专	否	1	0.403531			0.87569
29	814504952784363522	825352647728046082	用户47336	男	21	本科	否	0.984848	0.87569			0.508585
30	672532867649110016	825352708453179394	qzzziiii	女	23	硕士	否	0.939394	0.508585			0.433713
31	673561434503774208	825354460103581698	唠唠兔	男	22	本科	否	0.909091	0.433713			-0.270456
32	811326671591448577	825354602491813890	zy。	女	21	本科	否	0.969697	-0.270456			0.3207
33	796700428791324674	825355108576534530	用户43154	女	22	硕士	否	0.924242	0.3207			0.0473136
34	782180131438596097	825355578057564161	认真填问卷，感谢nd	女	23	硕士	否	0.833333	0.0473136			0.308206
35	817824511360638978	825358713069244417	用户48577	女	19	本科	否	0.848485	0.308206			0.231097
36	784865173377912833	825358929000402945	用户41054	女	22	本科	否	1	0.231097			-0.897447
37	807193813448794114	825358992254701570	文星	男	19	本科	否	0.909091	-0.897447			-0.0689186
38	689594271669420032	825359593940193282	黑天	女	24	硕士	否	0.969697	-0.0689186			0.334676
39	817773753256779777	825359699754094594	用户48435	女	23	硕士	否	1	0.334676			0.0909438
40	726389101590216704	825360186435964930	刘记林来了	男	21	本科	否	0.939394	0.0909438			0.648168
41	811258205521977346	825360575436689410	用户46719	女	34	本科	否	0.939394	0.648168			0.486905
42	814149306708795394	825360744609619970	用户47280	女	22	本科	否	0.893939	0.486905			-0.232556
43	678869245659971584	825362793980108802	智艳	女	35	中专	否	0.909091	-0.232556			0.622998
44	814945666198544385	825362941913210882	果子dd	女	19	本科	否	0.924242	0.622998			0.614572
45	812716411930681345	825363245991862274	用户47001	男	21	本科	否	0.984848	0.614572			-0.229101
46	724701248414023680	825363283195338754	收集金豆豆	女	20	本科	否	0.787879				-0.196383
47	684803700782268416	825363919345553410	闲人野鹤	男	21	本科	否	0.984848	-0.229101			-0.111143
48	802948118718062593	825364115383128065	用户44344	女	26	本科	否	0.954545	-0.196383			-0.890509
49	770357894809128961	825365567933390850	用户38741	男	40	中专	否	0.939394	-0.111143			0.673037
50	820599145415974914	825365958020440065	不会搁浅的鲨不是好傻	女	24	硕士	否	0.893939	-0.890509			-0.388316
51	816313269991120898	825366829848469506	用户47590	女	26	本科	否	0.969697	0.673037			0.341969
52	811563647259254785	825366830909628417	用户46793	女	20	本科	否	0.969697	-0.388316			0.178851
53	681419130565296128	825367025085059073	心如止水	女	30	本科	是	0.863636	0.341969			0.613633
54	810891698149400578	825367336952532994	运	女	23	本科	否	0.878788	0.178851			0.400593
55	813366350373330945	825367473971929089	用户47188	女	28	本科	否	0.742424				-0.448343
56	823206863364562946	825367530788098049	用户50042	男	22	本科	否	0.80303	0.613633			-0.57692
57	757161285636067329	825368383561404417	鲜花	女	35	中专	否	0.863636	0.400593			-0.719393
58	817775971045351426	825368916900585473	用户48481	女	19	本科	否	0.924242	-0.448343
59	560840082894880768	825369220161347586	木以欣欣向荣	男	23	本科	否	0.909091	-0.57692
60	825315260536983553	825369342677094402	用户50430	男	21	本科	否	0.924242	-0.719393
61	805105173193170946	825369713868804097	用户45037	女	23	本科	否	0.69697
