# Supplementary material for: Hairstyle gender stereotypes and their impact on character evaluation in the Chinese context
Source: Research Square preprint supplement (doi:10.21203/rs.3.rs-6521886/v1), 2025-11-14
Supplement: Supplementary file 10 [file Reaction Time-Implicit variance Analysis Data Table.xlsx]

## Sheet: 男性对象
									对象-发型-特质	一致-e键	一致-i键	不一致-e键	不一致-i键
序号	用户ID	被试者记录ID	被试者昵称	2、请选择你的性别	3、您的年龄？（仅数字）	4、请选择你的教育程度？	5、请选择你是否是左撇子？	正确率	D值	男-男	女-女	女-男	男-女
1	690525465995116544	825342510955237378	梁淑萍	2	22	本科	否	1	0.517375	0.791475	1.09058	1.41341	1.07366
2	806196485808070658	825342511139659778	用户45505	2	23	本科	否	0.954545	0.733402	0.667813	0.74506	0.86765	0.929621
3	825306535407263746	825342755210530817	用户50427	2	22	本科	否	0.954545	0.701598	0.8568	0.840393	1.23814	1.10036
4	818178645230231553	825343076888354818	用户48784	1	21	本科	否	0.742424
5	647190664760524800	825343183583059970	cjm	2	21	本科	否	0.939394	0.579049	0.640687	0.649586	0.702139	0.715636
6	774190846450077698	825343317448466434	用户39356	2	21	本科	否	0.969697	0.118103	0.745494	0.721925	0.774325	1.00909
7	655486449319149568	825344456588005378	Le	2	23	本科	否	0.984848	0.372813	0.949	1.06907	1.20857	1.08722
8	808799150652137474	825345052200144897	爱意	2	31	本科	否	0.878788	0.134063	0.754175	0.77644	0.9138	0.923521
9	609509373282091008	825345103148228610	牛牛牛	1	26	硕士	否	0.954545	0.0965591	1.26419	0.8931	1.14112	1.12294
10	823206396706299906	825345319154884609	总被1人钓	2	20	本科	否	0.954545	-0.0959803	1.35	1.37849	1.30306	1.31071
11	699559388309880832	825345331041669122	lh	1	22	硕士	否	0.939394	0.957498	0.586263	0.582879	0.691375	0.635069
12	814593943290388482	825345362511532034	国建华	2	23	本科	否	0.833333	0.207754	0.85445	0.803008	0.899	0.930533
13	562214616889819136	825345369759162369	村口大铁牛	2	23	本科	否	0.939394	-0.577628	1.09047	1.32967	0.9915	0.944375
14	802485898393559042	825345529356623874	星xing	2	23	本科	否	0.939394	-0.239294	0.802	0.879938	0.765333	0.8075
15	784384274496491522	825345704594771969	阿楠	1	20	本科	否	0.984848	0.25375	0.971525	1.23182	1.18017	1.27363
16	815231779131760642	825346106195058689	十一点半睡觉	2	21	本科	否	0.924242	0.191916	0.66984	0.68908	0.778576	0.639793
17	786592151617409026	825346208192270338	用户41281	2	25	硕士	否	1	-0.0501693	0.778594	0.862656	0.793789	0.823894
18	675059027545161728	825346358553747458	木头欣	2	22	本科	否	0.969697	0.122103	0.687183	0.636962	0.706712	0.640075
19	811326671591448577	825346582001098754	zy。	2	21	本科	否	0.984848	-0.11488	0.954388	0.806631	0.854971	0.896312
20	623927491781722112	825346618806116354	A_LXY_88	2	20	本科	否	0.954545	-0.614297	0.971977	1.64006	0.985888	0.800669
21	825137713463304194	825346621226229762	用户50412	1	20	本科	否	0.984848	0.0386505	0.982913	0.883506	0.980189	0.915381
22	819325705870516226	825346895797952514	用户49111	1	21	本科	否	0.969697	0.0553495	1.61545	1.34191	1.55812	1.42834
23	813212243926851585	825347373193760769	用户47182	1	22	本科	否	0.954545	0.86867	0.582427	0.745569	0.866287	0.926837
24	808095621021048833	825347406446075905	用户46004	1	23	本科	否	0.969697	0.430827	0.786507	1.02168	1.19504	1.12221
25	812716411930681345	825347853068275714	用户47001	1	21	本科	否	0.984848	0.190377	1.00651	0.880238	1.00147	0.969219
26	823939328853024769	825347910047768577	用户50132	1	20	本科	否	0.969697	0.640992	0.87325	0.94338	1.32841	1.22136
27	809540521402966018	825347945762394113	隐	2	22	本科	否	0.969697	-0.604807	1.50886	1.66786	1.24134	1.31948
28	820968896726179841	825348182228738049	好艰难	2	34	本科	否	0.984848	0.86003	0.70225	0.760875	0.995906	1.03331
29	763702761719336961	825348452006498305	淇淇最帅	2	27	本科	否	0.984848	0.306862	0.989269	0.840181	1.05817	1.08267
30	672532867649110016	825348645376368641	qzzziiii	2	23	硕士	否	0.984848	0.479031	0.795194	0.992156	1.00742	1.04134
31	680051628862078976	825349133752737794	惠风龢畅	1	23	本科	否	0.848485	0.23389	1.25562	1.20217	1.39025	1.42156
32	701370990290010112	825349164857696258	放羊老妪	2	22	本科	否	0.969697	0.53568	0.776625	0.904513	1.00794	1.01687
33	816390379342536706	825349767608668161	用户47628	1	20	本科	否	0.893939	0.689348	0.85385	0.903233	1.57863	1.14686
34	795667507930341377	825349861653352449	用户43055	2	31	本科	否	0.969697	0.152924	0.695956	0.836588	0.813344	0.79165
35	823545225829031937	825349988845494274	用户50087	2	22	本科	否	0.818182	-0.0929753	0.704907	0.640664	0.727673	0.5915
36	817772670216183810	825349995531341826	用户48410	1	36	本科	否	0.939394	0.350781	0.757569	0.962087	1.02627	1.09813
37	672528135719223296	825350197688279041	椰子爱吃糖	2	39	大专	否	0.984848	0.36623	0.764763	0.800175	0.887753	0.842337
38	673536821732311040	825350326935756802	Yoyo888	2	40	本科	否	0.969697	0.532144	0.817881	0.869469	1.06252	0.85405
39	787283836840185858	825350744982036481	Echo0963	2	23	本科	否	0.969697	0.614669	0.818175	0.876994	1.14405	0.991047
40	786312908387913730	825351031377629186	想要见光	1	21	本科	否	0.954545	-0.14988	0.804669	0.819233	0.814631	0.742031
41	784184343513010177	825351994419060738	用户40954	2	19	本科	否	0.924242	0.418385	0.708577	0.867313	0.884844	1.082
42	796700428791324674	825352530929389569	用户43154	2	22	硕士	否	0.954545	0.630974	0.705206	0.79375	0.946206	1.08337
43	764077949963210754	825353213673873409	孙宇涵	1	19	本科	否	0.893939	-0.163181	0.906713	1.07088	0.878129	0.877443
44	674176335228174336	825353245391200257	云淡风轻河南	2	22	大专	否	0.954545	0.494889	0.868031	0.788875	1.00829	0.889833
45	782180131438596097	825353357324591106	认真填问卷，感谢nd	2	22	硕士	否	0.893939	0.760399	0.64982	0.623379	0.850294	0.698323
46	733820079237763073	825353562463932417	用户30686	1	28	硕士	否	1	0.579268	0.725175	0.755881	0.976556	0.850413
47	799769861201993730	825354030229491713	薛415	2	24	硕士	否	0.954545	0.869643	0.741587	0.86	1.29803	1.07544
48	813554123508162562	825354318449352705	用户47229	2	24	本科	否	0.727273
49	818441284195852289	825354403937783810	用户48826	2	20	本科	否	0.954545	0.180809	0.854267	0.879027	0.944412	0.9017
50	820384111251300354	825354467829616641	aiyaya	1	31	本科	否	0.954545	0.37152	0.604738	0.792469	0.711263	0.749993
51	776002406046765058	825354785921310721	用户39727	2	20	本科	否	0.939394	0.0284735	0.774325	1.00903	0.84735	0.951233
52	807193813448794114	825355225333374978	文星	1	19	本科	否	0.787879
53	822841954890031105	825355670407749633	用户49976	1	22	本科	否	0.80303	0.402386	1.02576	0.729931	1.62408	0.942354
54	818086362468196353	825355774464237570	用户48729	2	28	本科	否	0.954545	-0.0858095	0.843325	1.07011	0.938481	0.92054
55	730025585505734658	825356618370785281	用户29645	2	25	本科	否	0.924242	0.425268	0.768647	0.835253	0.921781	0.946333
56	572019219441385472	825357106935898113	hercycc	2	24	硕士	否	0.969697	0.664943	0.632453	0.699856	0.788094	0.809213
57	702925565472014336	825357125772644354	华子	1	38	中专	否	0.954545	-0.670356	1.99399	1.73286	1.10892	1.16698
58	817773753256779777	825357591373942785	用户48435	2	23	硕士	否	0.984848	0.949604	0.635093	0.592881	0.766533	0.694994
59	726389101590216704	825357618460758017	刘记林来了	1	20	本科	否	0.969697	-0.568433	1.70602	1.25929	0.883218	0.927312
60	799384714044645377	825358232464793602	用户43513	2	20	本科	否	0.924242	0.293095	0.683919	0.745608	0.9225	0.715862
61	823602085667938306	825358533959880706	用户50107	1	22	本科	否	0.818182	0.372318	0.888587	1.29531	1.5446	1.31347
62	571361781235056640	825360353377525762	红小胖	2	23	本科	否	0.969697	0.855952	0.678575	0.746873	0.940229	1.0699
63	673561434503774208	825360618315059201	唠唠兔	1	22	本科	否	1	0.390279	0.742631	0.804194	0.892111	0.801019
64	646073645839417344	825362605207195649	1LIN1	2	22	本科	否	0.924242	-0.358427	0.589313	0.709731	0.63626	0.588986

## Sheet: Sheet1
				对象-发型-特质	一致-e键	一致-i键	不一致-e键	不一致-i键
序号	被试者昵称	2、请选择你的性别	正确率	D值	男-男	女-女	女-男	男-女
1	梁淑萍	2	1	0.517375	0.791475	1.09058	1.41341	1.07366
2	用户45505	2	0.954545	0.733402	0.667813	0.74506	0.86765	0.929621
3	用户50427	2	0.954545	0.701598	0.8568	0.840393	1.23814	1.10036
4	cjm	2	0.939394	0.579049	0.640687	0.649586	0.702139	0.715636
5	用户39356	2	0.969697	0.118103	0.745494	0.721925	0.774325	1.00909
6	Le	2	0.984848	0.372813	0.949	1.06907	1.20857	1.08722
7	爱意	2	0.878788	0.134063	0.754175	0.77644	0.9138	0.923521
8	牛牛牛	1	0.954545	0.0965591	1.26419	0.8931	1.14112	1.12294
9	总被1人钓	2	0.954545	-0.0959803	1.35	1.37849	1.30306	1.31071
10	lh	1	0.939394	0.957498	0.586263	0.582879	0.691375	0.635069
11	国建华	2	0.833333	0.207754	0.85445	0.803008	0.899	0.930533
12	村口大铁牛	2	0.939394	-0.577628	1.09047	1.32967	0.9915	0.944375
13	星xing	2	0.939394	-0.239294	0.802	0.879938	0.765333	0.8075
14	阿楠	1	0.984848	0.25375	0.971525	1.23182	1.18017	1.27363
15	十一点半睡觉	2	0.924242	0.191916	0.66984	0.68908	0.778576	0.639793
16	用户41281	2	1	-0.0501693	0.778594	0.862656	0.793789	0.823894
17	木头欣	2	0.969697	0.122103	0.687183	0.636962	0.706712	0.640075
18	zy。	2	0.984848	-0.11488	0.954388	0.806631	0.854971	0.896312
19	A_LXY_88	2	0.954545	-0.614297	0.971977	1.64006	0.985888	0.800669
20	用户50412	1	0.984848	0.0386505	0.982913	0.883506	0.980189	0.915381
21	用户49111	1	0.969697	0.0553495	1.61545	1.34191	1.55812	1.42834
22	用户47182	1	0.954545	0.86867	0.582427	0.745569	0.866287	0.926837
23	用户46004	1	0.969697	0.430827	0.786507	1.02168	1.19504	1.12221
24	用户47001	1	0.984848	0.190377	1.00651	0.880238	1.00147	0.969219
25	用户50132	1	0.969697	0.640992	0.87325	0.94338	1.32841	1.22136
26	隐	2	0.969697	-0.604807	1.50886	1.66786	1.24134	1.31948
27	好艰难	2	0.984848	0.86003	0.70225	0.760875	0.995906	1.03331
28	淇淇最帅	2	0.984848	0.306862	0.989269	0.840181	1.05817	1.08267
29	qzzziiii	2	0.984848	0.479031	0.795194	0.992156	1.00742	1.04134
30	惠风龢畅	1	0.848485	0.23389	1.25562	1.20217	1.39025	1.42156
31	放羊老妪	2	0.969697	0.53568	0.776625	0.904513	1.00794	1.01687
32	用户47628	1	0.893939	0.689348	0.85385	0.903233	1.57863	1.14686
33	用户43055	2	0.969697	0.152924	0.695956	0.836588	0.813344	0.79165
34	用户50087	2	0.818182	-0.0929753	0.704907	0.640664	0.727673	0.5915
35	用户48410	1	0.939394	0.350781	0.757569	0.962087	1.02627	1.09813
36	椰子爱吃糖	2	0.984848	0.36623	0.764763	0.800175	0.887753	0.842337
37	Yoyo888	2	0.969697	0.532144	0.817881	0.869469	1.06252	0.85405
38	Echo0963	2	0.969697	0.614669	0.818175	0.876994	1.14405	0.991047
39	想要见光	1	0.954545	-0.14988	0.804669	0.819233	0.814631	0.742031
40	用户40954	2	0.924242	0.418385	0.708577	0.867313	0.884844	1.082
41	用户43154	2	0.954545	0.630974	0.705206	0.79375	0.946206	1.08337
42	孙宇涵	1	0.893939	-0.163181	0.906713	1.07088	0.878129	0.877443
43	云淡风轻河南	2	0.954545	0.494889	0.868031	0.788875	1.00829	0.889833
44	认真填问卷，感谢nd	2	0.893939	0.760399	0.64982	0.623379	0.850294	0.698323
45	用户30686	1	1	0.579268	0.725175	0.755881	0.976556	0.850413
46	薛415	2	0.954545	0.869643	0.741587	0.86	1.29803	1.07544
47	用户48826	2	0.954545	0.180809	0.854267	0.879027	0.944412	0.9017
48	aiyaya	1	0.954545	0.37152	0.604738	0.792469	0.711263	0.749993
49	用户39727	2	0.939394	0.0284735	0.774325	1.00903	0.84735	0.951233
50	用户49976	1	0.80303	0.402386	1.02576	0.729931	1.62408	0.942354
51	用户48729	2	0.954545	-0.0858095	0.843325	1.07011	0.938481	0.92054
52	用户29645	2	0.924242	0.425268	0.768647	0.835253	0.921781	0.946333
53	hercycc	2	0.969697	0.664943	0.632453	0.699856	0.788094	0.809213
54	华子	1	0.954545	-0.670356	1.99399	1.73286	1.10892	1.16698
55	用户48435	2	0.984848	0.949604	0.635093	0.592881	0.766533	0.694994
56	刘记林来了	1	0.969697	-0.568433	1.70602	1.25929	0.883218	0.927312
57	用户43513	2	0.924242	0.293095	0.683919	0.745608	0.9225	0.715862
58	用户50107	1	0.818182	0.372318	0.888587	1.29531	1.5446	1.31347
59	红小胖	2	0.969697	0.855952	0.678575	0.746873	0.940229	1.0699
60	唠唠兔	1	1	0.390279	0.742631	0.804194	0.892111	0.801019
61	1LIN1	2	0.924242	-0.358427	0.589313	0.709731	0.63626	0.588986

## Sheet: 女性对象
									对象-发型-特质	一致-e键	一致-i键	不一致-e键	不一致-i键
序号	用户ID	被试者记录ID	被试者昵称	2、请选择你的性别	3、您的年龄？（仅数字）	4、请选择你的教育程度？	5、请选择你是否是左撇子？	正确率	D值	女-女	男-男	男-女	女-男
1	802485898393559042	825342059614445569	星xing	2	23	本科	否	0.909091	0.52721	0.877385	0.92815	1.22838	1.05563
2	811263334014918657	825342152971264001	阿拉雷	2	22	本科	否	0.984848	0.0611997	0.96602	0.988688	0.933087	1.05082
3	821762231938195457	825342238497316866	用户49655	2	25	本科	否	0.939394	-0.444404	1.14925	1.24373	0.885312	0.954733
4	772056166992973826	825342251436871682	易笙	2	23	本科	否	1	-0.0734515	0.937175	0.832562	0.893787	0.804512
5	820968896726179841	825342279559680001	好艰难	2	34	本科	否	0.984848	0.0190376	1.05363	1.01394	1.15347	0.925813
6	726386042323599360	825342356596461569	刘继林来了	1	21	本科	否	0.969697	0.116662	0.794793	0.844771	0.811927	0.845675
7	801811764370087937	825342851847168002	雨落梧桐	2	20	本科	否	0.69697
8	768804353862799361	825344328909197313	欣欣啊	2	21	本科	否	0.969697	0.129074	0.686056	0.900733	0.723333	0.878212
9	735065258095546369	825344641321803777	天蝎小龙虾	1	30	硕士	是	0.909091	-0.755352	0.943079	0.83128	0.634067	0.649962
10	804020891741724673	825345022823239682	用户44584	2	22	本科	否	0.818182	0.663525	1.19891	0.988392	1.44671	1.81583
11	817680286941847554	825345076170592257	用户48171	2	22	本科	否	0.909091	0.351098	0.65084	0.789527	0.715192	0.924456
12	702925565472014336	825345195334963201	华子	1	38	中专	否	0.939394	0.367288	1.02906	0.968693	0.970093	1.45435
13	647190664760524800	825345259969187841	cjm	2	21	本科	否	0.909091	-0.404834	0.960231	0.877467	0.736279	0.713227
14	673536821732311040	825345839793967105	Yoyo888	2	40	本科	否	0.878788	-0.760059	1.10242	1.28328	0.7882	0.879757
15	655486449319149568	825347156729925633	Le	2	23	本科	否	0.954545	0.0334887	1.5085	1.09841	1.06451	1.11773
16	699559388309880832	825347330264932353	lh	1	22	硕士	否	0.909091	0.764241	0.50654	0.58444	0.618943	0.61815
17	817772670216183810	825347387466977281	用户48410	1	32	本科	否	1	0.859498	0.797106	0.800781	1.41203	1.33757
18	609509373282091008	825348129313398785	牛牛牛	1	26	硕士	否	0.954545	-0.430072	1.46793	1.27899	1.20262	1.04242
19	690525465995116544	825348185026338817	梁淑萍	2	22	本科	否	0.984848	0.370735	0.774365	0.83494	0.891509	0.888298
20	786592151617409026	825348546952830977	用户41281	2	25	硕士	否	0.984848	0.0125308	1.24399	0.776706	0.915487	0.908737
21	808095621021048833	825349773128372225	用户46004	1	23	本科	否	0.969697	-0.835474	1.47303	1.54246	0.886294	1.07869
22	730803699089412097	825349826396033025	记得带耳机哦	2	23	本科	否	0.984848	0.422372	0.633444	0.747663	0.785527	0.760012
23	562214616889819136	825350411312570369	村口大铁牛	2	23	本科	否	0.954545	-0.102945	1.19419	1.55247	1.18807	1.308
24	674176335228174336	825350446242734082	云淡风轻河南	2	22	大专	否	0.969697	0.0724599	0.881494	0.953638	0.983131	0.896619
25	675059027545161728	825350649679060993	木头欣	2	22	本科	否	0.984848	-0.28493	0.687933	0.732269	0.644094	0.627537
26	634786876431007744	825350659531608065	卡布奇洛	2	24	本科	否	1	-0.406652	0.818844	0.798194	0.699462	0.687925
27	680051628862078976	825352201148043265	惠风龢畅	1	23	本科	否	0.878788	-0.157969	1.20606	1.18472	1.10989	0.944593
28	672528135719223296	825352413073641473	椰子爱吃糖	2	40	大专	否	1	0.403531	0.76045	0.837919	0.807588	0.924825
29	814504952784363522	825352647728046082	用户47336	1	21	本科	否	0.984848	0.87569	0.830412	1.05861	1.37709	1.37732
30	672532867649110016	825352708453179394	qzzziiii	2	23	硕士	否	0.939394	0.508585	1.00245	1.08681	1.29723	1.82189
31	673561434503774208	825354460103581698	唠唠兔	1	22	本科	否	0.909091	0.433713	1.23358	0.947567	1.34108	1.28094
32	811326671591448577	825354602491813890	zy。	2	21	本科	否	0.969697	-0.270456	1.03797	0.978337	1.01273	0.749333
33	796700428791324674	825355108576534530	用户43154	2	22	硕士	否	0.924242	0.3207	0.75062	1.25185	1.19782	1.39208
34	782180131438596097	825355578057564161	认真填问卷，感谢nd	2	23	硕士	否	0.833333	0.0473136	0.6567	0.755233	0.619721	0.764542
35	817824511360638978	825358713069244417	用户48577	2	19	本科	否	0.848485	0.308206	0.953833	0.770033	0.861233	1.33798
36	784865173377912833	825358929000402945	用户41054	2	22	本科	否	1	0.231097	1.2963	1.44167	1.74235	1.55433
37	807193813448794114	825358992254701570	文星	1	19	本科	否	0.909091	-0.897447	1.0064	1.04845	0.7077	0.670206
38	689594271669420032	825359593940193282	黑天	2	24	硕士	否	0.969697	-0.0689186	1.02547	1.08086	1.07857	0.976069
39	817773753256779777	825359699754094594	用户48435	2	23	硕士	否	1	0.334676	0.670312	0.642175	0.679612	0.717581
40	726389101590216704	825360186435964930	刘记林来了	1	21	本科	否	0.939394	0.0909438	0.807256	0.710381	0.796775	0.730943
41	811258205521977346	825360575436689410	用户46719	2	34	本科	否	0.939394	0.648168	0.975773	0.906975	1.09714	1.38112
42	814149306708795394	825360744609619970	用户47280	2	22	本科	否	0.893939	0.486905	0.941373	0.819518	1.18584	0.986306
43	678869245659971584	825362793980108802	智艳	2	35	中专	否	0.909091	-0.232556	1.00717	0.950233	0.859777	0.892781
44	814945666198544385	825362941913210882	果子dd	2	19	本科	否	0.924242	0.622998	0.591094	0.723744	0.769462	1.18729
45	812716411930681345	825363245991862274	用户47001	1	21	本科	否	0.984848	0.614572	1.2426	1.19584	1.66751	1.95915
46	724701248414023680	825363283195338754	收集金豆豆	2	20	本科	否	0.787879
47	684803700782268416	825363919345553410	闲人野鹤	1	21	本科	否	0.984848	-0.229101	1.41394	1.319	1.10933	1.35575
48	802948118718062593	825364115383128065	用户44344	2	26	本科	否	0.954545	-0.196383	0.7358	1.08003	0.637793	0.800744
49	770357894809128961	825365567933390850	用户38741	1	40	中专	否	0.939394	-0.111143	0.695187	0.99296	0.731394	0.830846
50	820599145415974914	825365958020440065	不会搁浅的鲨不是好傻	2	24	硕士	否	0.893939	-0.890509	0.994631	1.02011	1.4417	1.39175
51	816313269991120898	825366829848469506	用户47590	2	26	本科	否	0.969697	0.673037	1.57645	1.69889	0.917873	1.11131
52	811563647259254785	825366830909628417	用户46793	2	20	本科	否	0.969697	-0.388316	1.69844	1.26431	1.20413	1.08364
53	681419130565296128	825367025085059073	心如止水	2	30	本科	是	0.863636	0.341969	1.10538	1.15285	1.48143	0.992433
54	810891698149400578	825367336952532994	运	2	23	本科	否	0.878788	0.178851	0.898533	0.698625	0.80525	0.888667
55	813366350373330945	825367473971929089	用户47188	2	28	本科	否	0.742424
56	823206863364562946	825367530788098049	用户50042	1	22	本科	否	0.80303	0.613633	0.694307	0.772317	1.07599	0.875915
57	757161285636067329	825368383561404417	鲜花	2	35	中专	否	0.863636	0.400593	0.723308	0.784807	0.78675	0.89655
58	817775971045351426	825368916900585473	用户48481	2	19	本科	否	0.924242	-0.448343	0.734064	0.919267	0.673393	0.711425
59	560840082894880768	825369220161347586	木以欣欣向荣	1	23	本科	否	0.909091	-0.57692	0.900369	1.0438	0.821712	0.71044
60	825315260536983553	825369342677094402	用户50430	1	21	本科	否	0.924242	-0.719393	0.910194	1.01561	0.786544	0.709592
61	805105173193170946	825369713868804097	用户45037	2	23	本科	否	0.69697

## Sheet: Sheet2
				对象-发型-特质	一致-e键	一致-i键	不一致-e键	不一致-i键
序号	被试者昵称	2、请选择你的性别	正确率	D值	女-女	男-男	男-女	女-男
1	星xing	2	0.909091	0.52721	0.877385	0.92815	1.22838	1.05563
2	阿拉雷	2	0.984848	0.0611997	0.96602	0.988688	0.933087	1.05082
3	用户49655	2	0.939394	-0.444404	1.14925	1.24373	0.885312	0.954733
4	易笙	2	1	-0.0734515	0.937175	0.832562	0.893787	0.804512
5	好艰难	2	0.984848	0.0190376	1.05363	1.01394	1.15347	0.925813
6	刘继林来了	1	0.969697	0.116662	0.794793	0.844771	0.811927	0.845675
7	欣欣啊	2	0.969697	0.129074	0.686056	0.900733	0.723333	0.878212
8	天蝎小龙虾	1	0.909091	-0.755352	0.943079	0.83128	0.634067	0.649962
9	用户44584	2	0.818182	0.663525	1.19891	0.988392	1.44671	1.81583
10	用户48171	2	0.909091	0.351098	0.65084	0.789527	0.715192	0.924456
11	华子	1	0.939394	0.367288	1.02906	0.968693	0.970093	1.45435
12	cjm	2	0.909091	-0.404834	0.960231	0.877467	0.736279	0.713227
13	Yoyo888	2	0.878788	-0.760059	1.10242	1.28328	0.7882	0.879757
14	Le	2	0.954545	0.0334887	1.5085	1.09841	1.06451	1.11773
15	lh	1	0.909091	0.764241	0.50654	0.58444	0.618943	0.61815
16	用户48410	1	1	0.859498	0.797106	0.800781	1.41203	1.33757
17	牛牛牛	1	0.954545	-0.430072	1.46793	1.27899	1.20262	1.04242
18	梁淑萍	2	0.984848	0.370735	0.774365	0.83494	0.891509	0.888298
19	用户41281	2	0.984848	0.0125308	1.24399	0.776706	0.915487	0.908737
20	用户46004	1	0.969697	-0.835474	1.47303	1.54246	0.886294	1.07869
21	记得带耳机哦	2	0.984848	0.422372	0.633444	0.747663	0.785527	0.760012
22	村口大铁牛	2	0.954545	-0.102945	1.19419	1.55247	1.18807	1.308
23	云淡风轻河南	2	0.969697	0.0724599	0.881494	0.953638	0.983131	0.896619
24	木头欣	2	0.984848	-0.28493	0.687933	0.732269	0.644094	0.627537
25	卡布奇洛	2	1	-0.406652	0.818844	0.798194	0.699462	0.687925
26	惠风龢畅	1	0.878788	-0.157969	1.20606	1.18472	1.10989	0.944593
27	椰子爱吃糖	2	1	0.403531	0.76045	0.837919	0.807588	0.924825
28	用户47336	1	0.984848	0.87569	0.830412	1.05861	1.37709	1.37732
29	qzzziiii	2	0.939394	0.508585	1.00245	1.08681	1.29723	1.82189
30	唠唠兔	1	0.909091	0.433713	1.23358	0.947567	1.34108	1.28094
31	zy。	2	0.969697	-0.270456	1.03797	0.978337	1.01273	0.749333
32	用户43154	2	0.924242	0.3207	0.75062	1.25185	1.19782	1.39208
33	认真填问卷，感谢nd	2	0.833333	0.0473136	0.6567	0.755233	0.619721	0.764542
34	用户48577	2	0.848485	0.308206	0.953833	0.770033	0.861233	1.33798
35	用户41054	2	1	0.231097	1.2963	1.44167	1.74235	1.55433
36	文星	1	0.909091	-0.897447	1.0064	1.04845	0.7077	0.670206
37	黑天	2	0.969697	-0.0689186	1.02547	1.08086	1.07857	0.976069
38	用户48435	2	1	0.334676	0.670312	0.642175	0.679612	0.717581
39	刘记林来了	1	0.939394	0.0909438	0.807256	0.710381	0.796775	0.730943
40	用户46719	2	0.939394	0.648168	0.975773	0.906975	1.09714	1.38112
41	用户47280	2	0.893939	0.486905	0.941373	0.819518	1.18584	0.986306
42	智艳	2	0.909091	-0.232556	1.00717	0.950233	0.859777	0.892781
43	果子dd	2	0.924242	0.622998	0.591094	0.723744	0.769462	1.18729
44	用户47001	1	0.984848	0.614572	1.2426	1.19584	1.66751	1.95915
45	闲人野鹤	1	0.984848	-0.229101	1.41394	1.319	1.10933	1.35575
46	用户44344	2	0.954545	-0.196383	0.7358	1.08003	0.637793	0.800744
47	用户38741	1	0.939394	-0.111143	0.695187	0.99296	0.731394	0.830846
48	不会搁浅的鲨不是好傻	2	0.893939	-0.890509	0.994631	1.02011	1.4417	1.39175
49	用户47590	2	0.969697	0.673037	1.57645	1.69889	0.917873	1.11131
50	用户46793	2	0.969697	-0.388316	1.69844	1.26431	1.20413	1.08364
51	心如止水	2	0.863636	0.341969	1.10538	1.15285	1.48143	0.992433
52	运	2	0.878788	0.178851	0.898533	0.698625	0.80525	0.888667
53	用户50042	1	0.80303	0.613633	0.694307	0.772317	1.07599	0.875915
54	鲜花	2	0.863636	0.400593	0.723308	0.784807	0.78675	0.89655
55	用户48481	2	0.924242	-0.448343	0.734064	0.919267	0.673393	0.711425
56	木以欣欣向荣	1	0.909091	-0.57692	0.900369	1.0438	0.821712	0.71044
57	用户50430	1	0.924242	-0.719393	0.910194	1.01561	0.786544	0.709592
