# Supplementary material for: Hairstyle gender stereotypes and their impact on character evaluation in the Chinese context
Source: Research Square preprint supplement (doi:10.21203/rs.3.rs-6521886/v1), 2025-11-14
Supplement: Supplementary file 11 [file IAT_block1.xlsx]

## Sheet: Sheet1
stims11	correct_key1
背头发型的赵秋薇	i
背头发型的朱妍悦	i
油头发型的赵秋薇	i
油头发型的朱妍悦	i
波形发型的赵秋薇	e
波形发型的朱妍悦	e
双发辨发型的赵秋薇	e
双发辨发型的朱妍悦	e
