# Supplementary material for: Hairstyle gender stereotypes and their impact on character evaluation in the Chinese context
Source: Research Square preprint supplement (doi:10.21203/rs.3.rs-6521886/v1), 2025-11-14
Supplement: Supplementary file 13 [file IAT_block3.xlsx]

## Sheet: Sheet1
stims33	correct_key3
背头发型的赵秋薇	i
背头发型的朱妍悦	i
油头发型的赵秋薇	i
油头发型的朱妍悦	i
有竞争性的	i
有能力的	i
独立的	i
自信的	i
波形发型的赵秋薇	e
波形发型的朱妍悦	e
双发辨发型的赵秋薇	e
双发辨发型的朱妍悦	e
宽容的	e
真诚的	e
热情的	e
和善的	e
