# Supplementary material for: Hairstyle gender stereotypes and their impact on character evaluation in the Chinese context
Source: Research Square preprint supplement (doi:10.21203/rs.3.rs-6521886/v1), 2025-11-14
Supplement: Supplementary file 22 [file IAT_block5.xlsx]

## Sheet: Sheet1
stims55	correct_key5
波形发型的高振毅	e
波形发型的吴昊峰	e
双发辨发型的高振毅	e
双发辨发型的吴昊峰	e
背头发型的高振毅	i
背头发型的吴昊峰	i
油头发型的高振毅	i
油头发型的吴昊峰	i
