# Supplementary material for: Hairstyle gender stereotypes and their impact on character evaluation in the Chinese context
Source: Research Square preprint supplement (doi:10.21203/rs.3.rs-6521886/v1), 2025-11-14
Supplement: Supplementary file 25 [file Appendix 1 The Hairstyle Gender Stereotype Questionnaire .docx]

**Appendix 1**

**The Hairstyle Gender Stereotype Questionnaire**

Dear Participant,

Thank you for taking the time to participate in this survey! Your input is invaluable to our research. This study aims to explore the relationship between everyday hairstyles and social stereotypes, and we sincerely appreciate your honest responses. The survey is completely anonymous, and your personal information will be kept strictly confidential. It is expected to take approximately 3 minutes to complete at your convenience.

If you have any questions or need further information while filling out the questionnaire, please feel free to contact us. Your feedback is highly valued.

Thank you for your participation and support!

1. Your Gender:

○ Female

○ Male

2. Your Education Level:

○ Junior high school or below

○ High school/Vocational school

○ Associate degree

○ Bachelor’s degree

○ Postgraduate or above

3. Your Age:

************

4. Please briefly describe your daily hairstyle.

************

5. To what extent do people associate the following hairstyles with **males**?

**
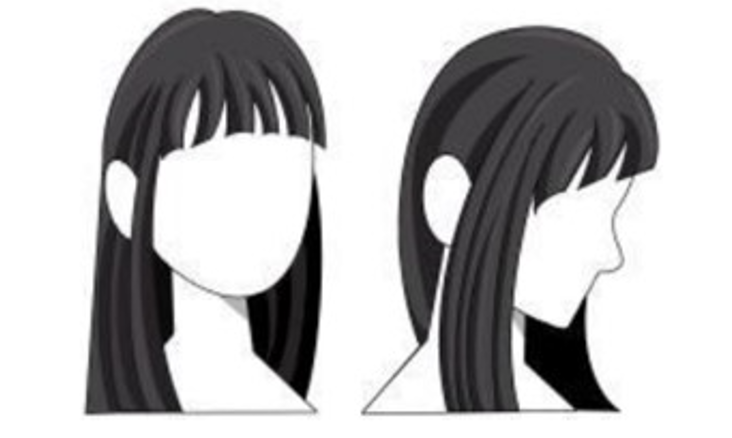
**

| **Very Disagree** | **Somewhat Disagree** | **Slightly Disagree** | **Uncertain** | **Slightly Agree** | **Somewhat Agree** | **Very Agree** |
| --- | --- | --- | --- | --- | --- | --- |
|  |  |  |  |  |  |  |

15. To what extent do people associate the following hairstyles with **females**?

**
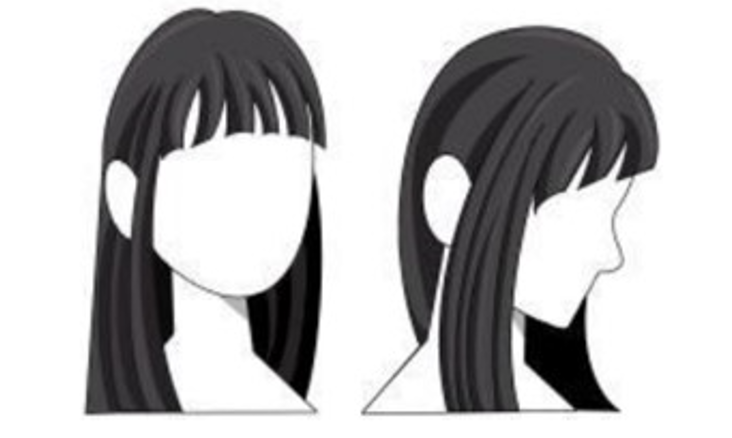
**

| **Very Disagree** | **Somewhat Disagree** | **Slightly Disagree** | **Uncertain** | **Slightly Agree** | **Somewhat Agree** | **Very Agree** |
| --- | --- | --- | --- | --- | --- | --- |
|  |  |  |  |  |  |  |

**Explanation:**

The questionnaire consists of 20 items, formed by combining **male** and **female** evaluation subjects with the **ten** gendered hairstyles

**Ten gendered hairstyles**

**
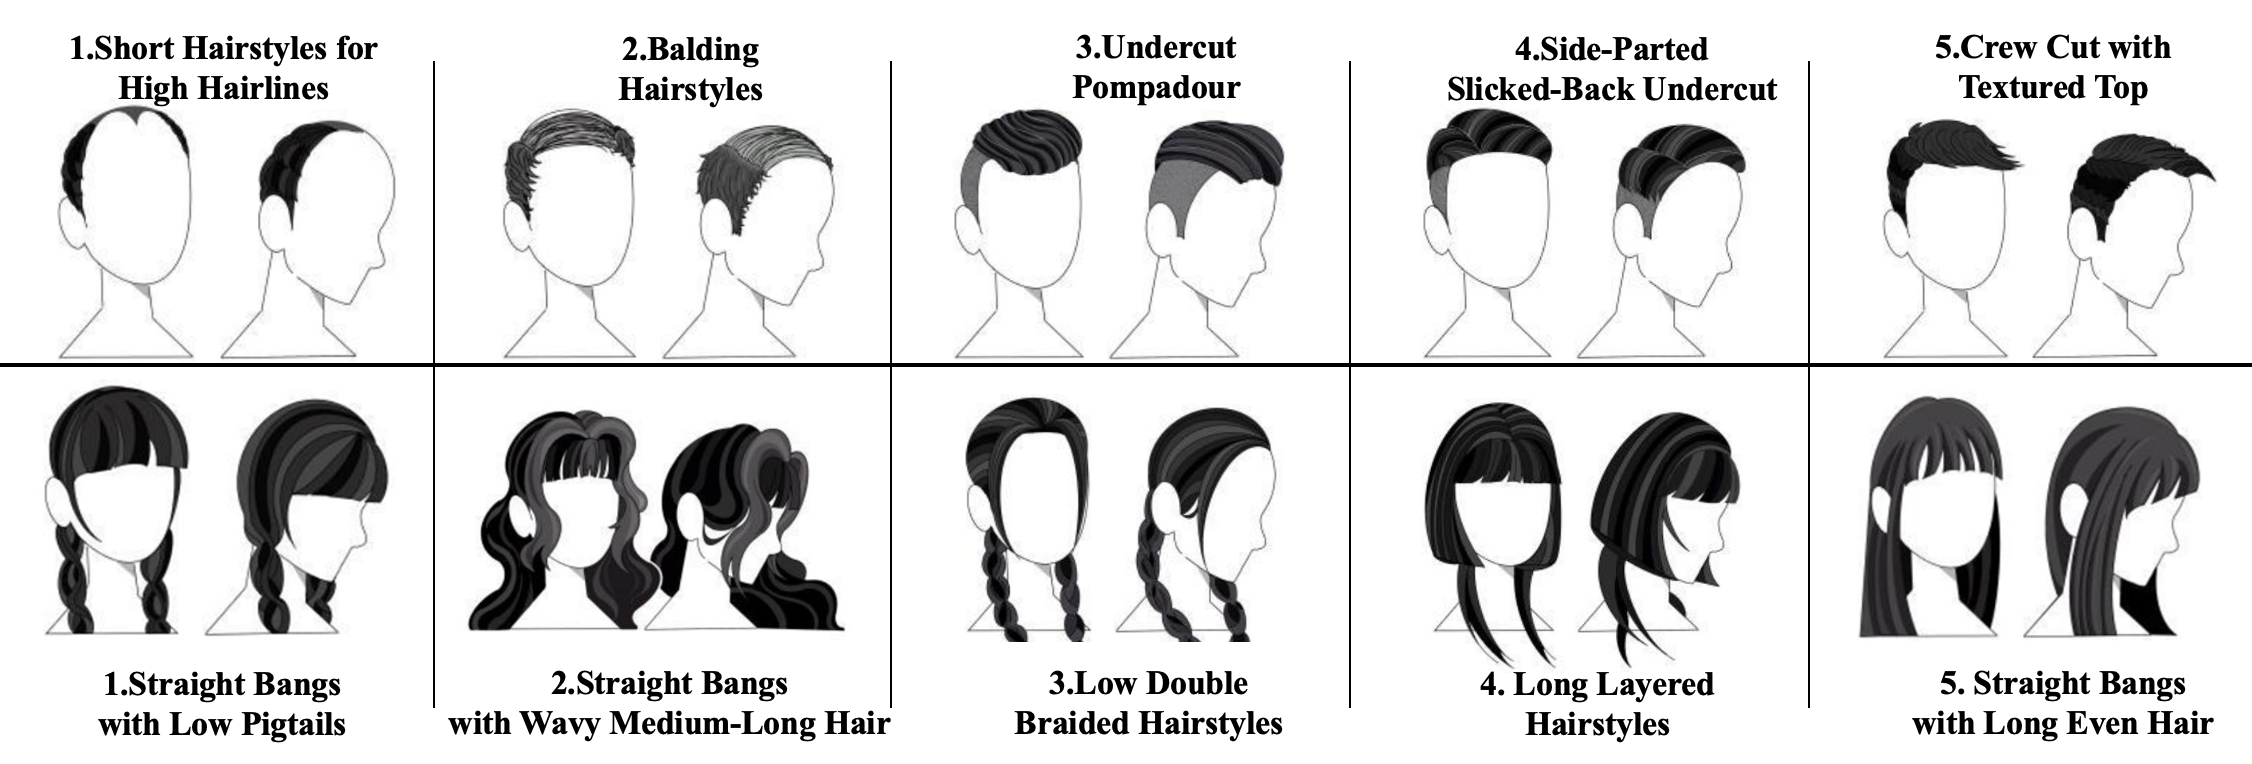
**
