# Supplementary material for: Hairstyle gender stereotypes and their impact on character evaluation in the Chinese context
Source: Research Square preprint supplement (doi:10.21203/rs.3.rs-6521886/v1), 2025-11-14
Supplement: Supplementary file 26 [file Appendix 2 The Gendered Hairstyles and Personal Evaluation Questionnaire .docx]

**Appendix 2**

**The Gendered Hairstyles and Personal Evaluation Questionnaire**

Dear Participant,

Thank you for taking the time to participate in this survey! Your input is invaluable to our research. This study aims to explore the relationship between everyday hairstyles and social stereotypes, and we sincerely appreciate your honest responses. The survey is completely anonymous, and your personal information will be kept strictly confidential. It is expected to take approximately 10 minutes to complete at your convenience.

If you have any questions or need further information while filling out the questionnaire, please feel free to contact us. Your feedback is highly valued.

Thank you for your participation and support!

1. Your Gender:

○ Female

○ Male

2. Your Education Level:

○ Junior high school or below

○ High school/Vocational school

○ Associate degree

○ Bachelor’s degree

○ Postgraduate or above

3. Your Age:

************

4. Please briefly describe your daily hairstyle.

************


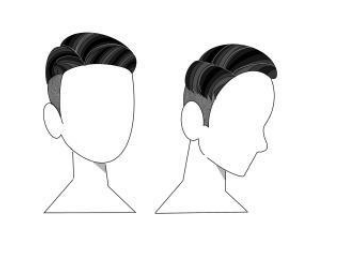
5. Gao Zhen-yi (Male) prefers a Side-Parted Slicked-Back Undercut hairstyle (as shown in the picture). Please assess to what extent he fits the following descriptors.

**（Side-Parted Slicked-Back Undercut）**

|  | **Very Inconsistent** | **Somewhat Inconsistent** | **Slightly Inconsistent** | **Uncertain** | **Slightly Consistent** | **Somewhat Consistent** | **Very Consistent** |
| --- | --- | --- | --- | --- | --- | --- | --- |
| **Competent** | ○ | ○ | ○ | ○ | ○ | ○ | ○ |
| **Warm** | ○ | ○ | ○ | ○ | ○ | ○ | ○ |
| **Confident** | ○ | ○ | ○ | ○ | ○ | ○ | ○ |
| **Tolerant** | ○ | ○ | ○ | ○ | ○ | ○ | ○ |
| **Independent** | ○ | ○ | ○ | ○ | ○ | ○ | ○ |
| **Kind** | ○ | ○ | ○ | ○ | ○ | ○ | ○ |
| **Competitive** | ○ | ○ | ○ | ○ | ○ | ○ | ○ |
| **Sincere** | ○ | ○ | ○ | ○ | ○ | ○ | ○ |
| **Intelligent** | ○ | ○ | ○ | ○ | ○ | ○ | ○ |
| **Trustworthy** | ○ | ○ | ○ | ○ | ○ | ○ | ○ |

**Explanation:**

The questionnaire consists of 20 items, formed by randomly combining four target names (male: Zhou Hao-feng, Gao Zhen-yi; female: Zhao Qi-wei, Zhu Yan-yue) with the ten gendered hairstyles.
