# Supplementary figures and images for: Hairstyle gender stereotypes and their impact on character evaluation in the Chinese context
Source: Research Square preprint supplement (doi:10.21203/rs.3.rs-6521886/v1), 2025-11-14

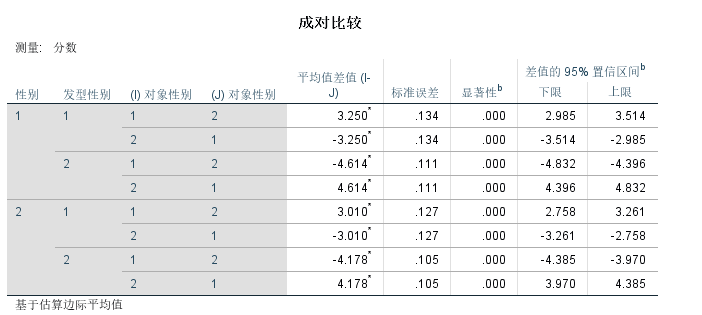


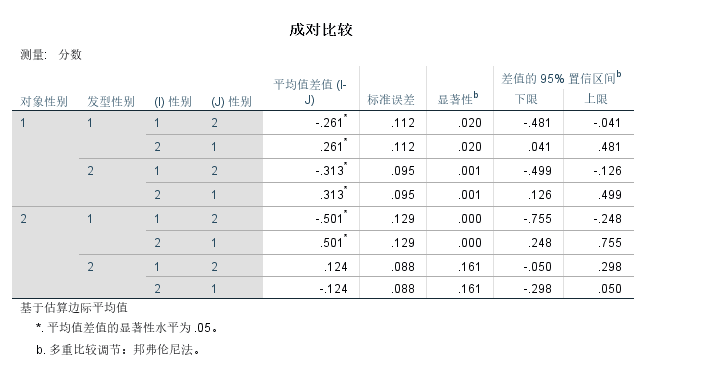


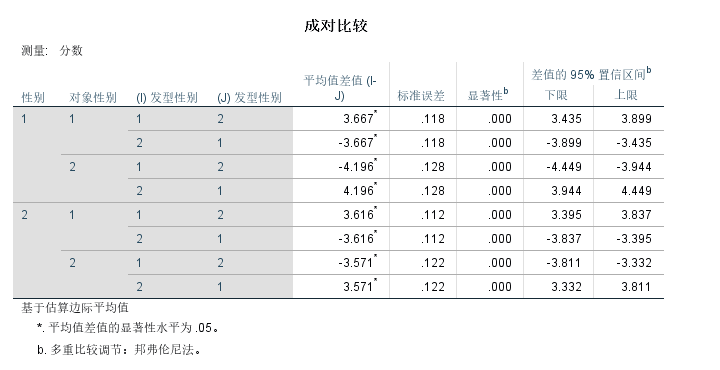

Supplement: Supplementary file 2 [file result of the experiments, new.docx]

内隐1


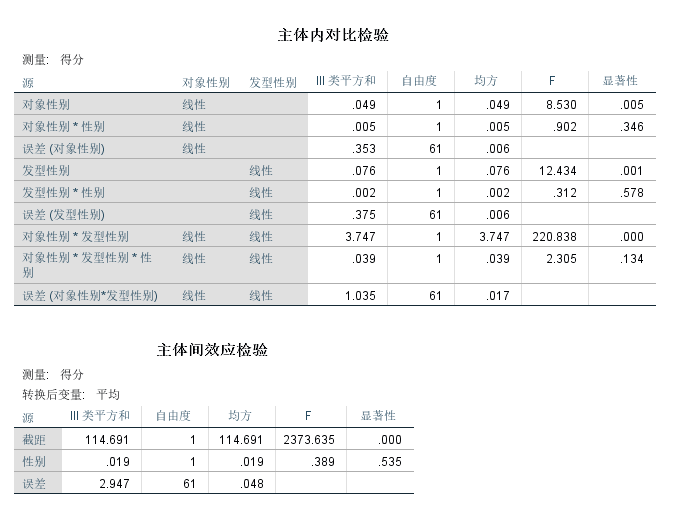


对象性别


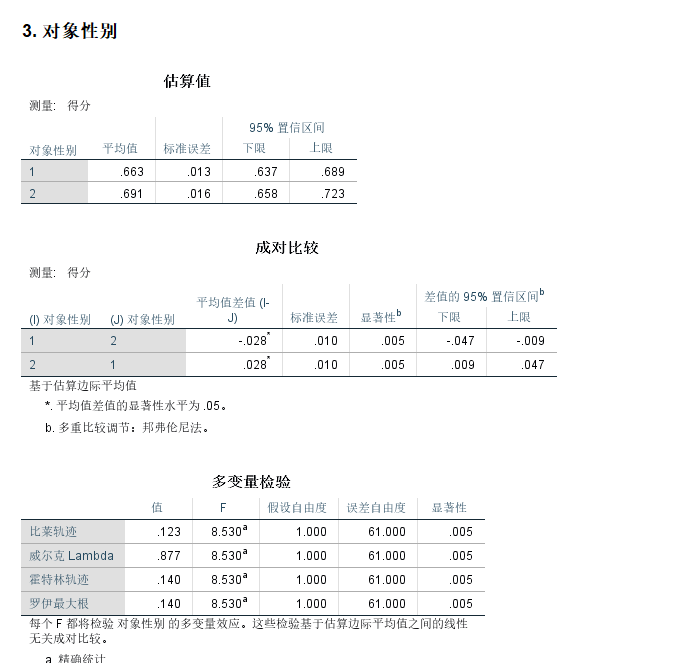


发型性别


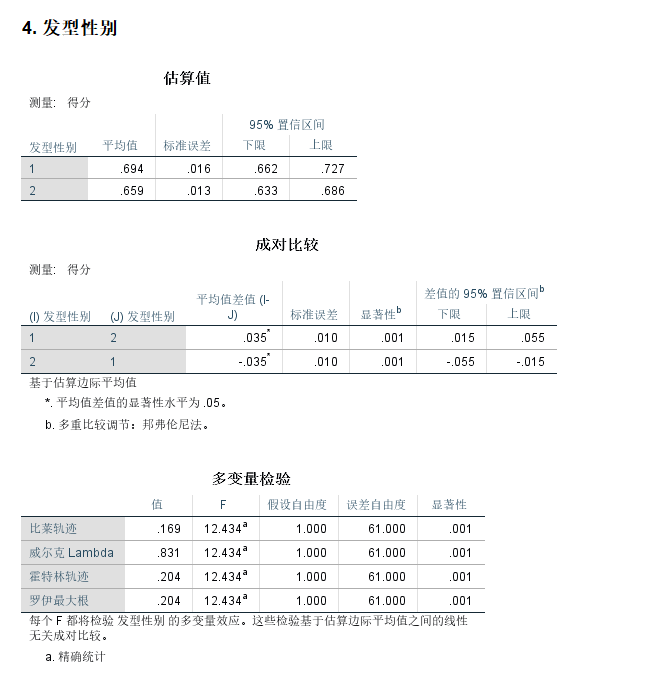


对象性别-发型性别


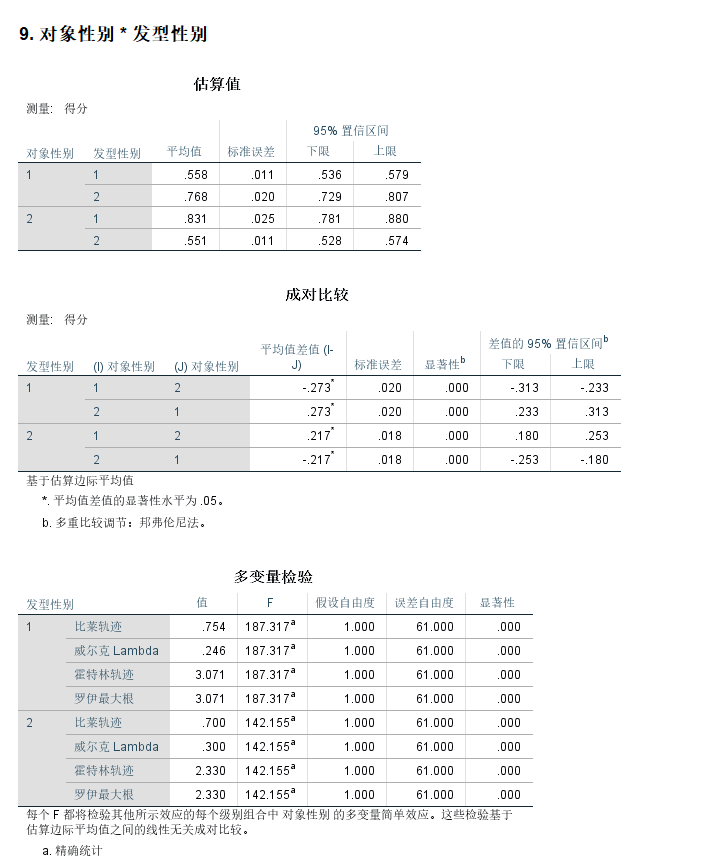


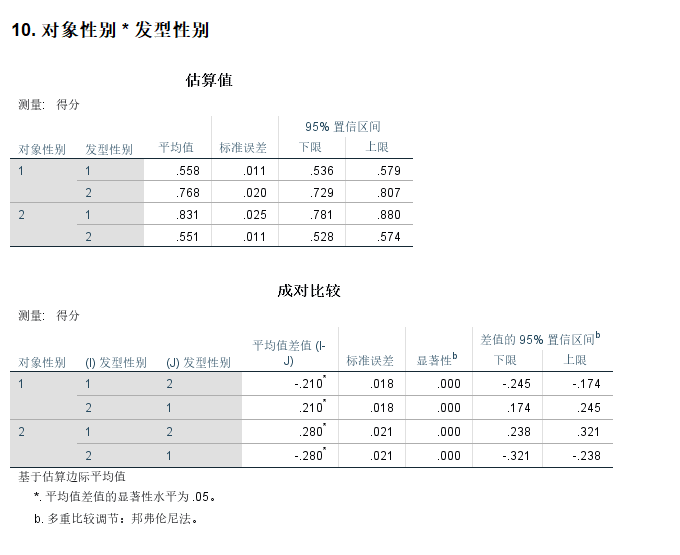


内隐2

男性对象


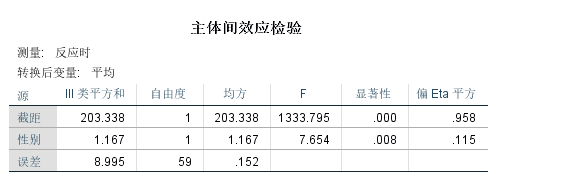

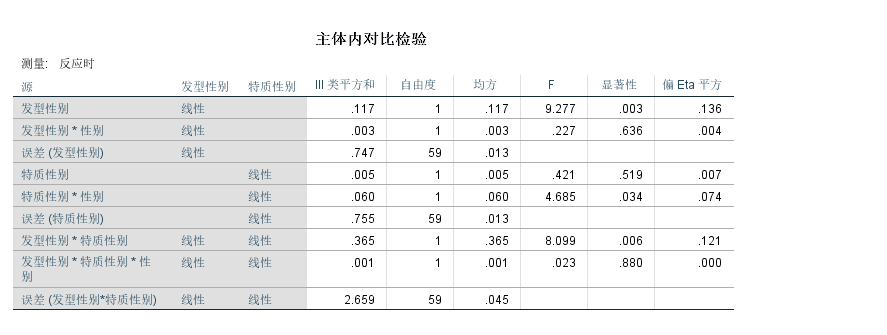


被试性别：


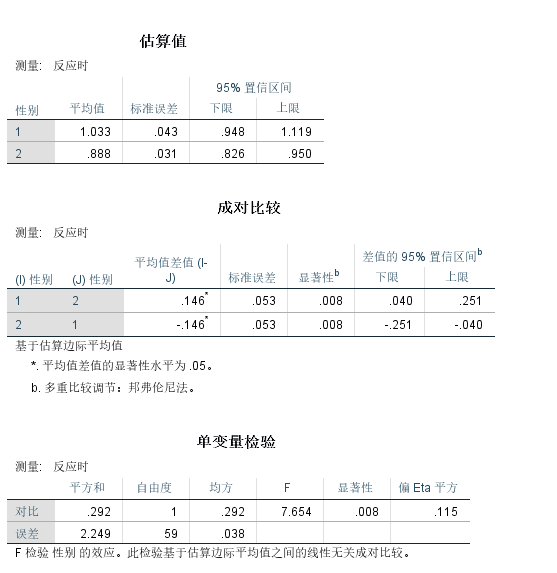


发型性别：


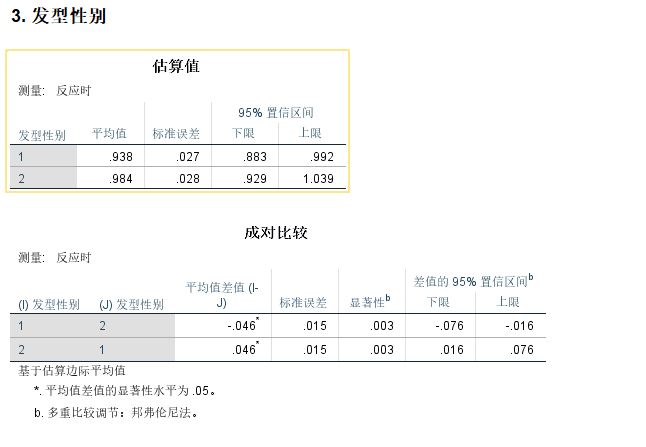


被试性别——特质性别：


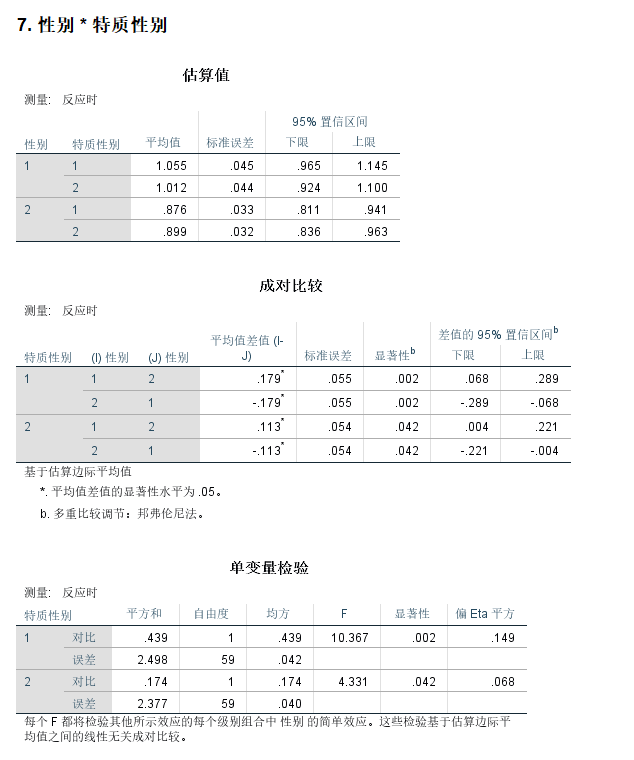


发型性别——特质性别：


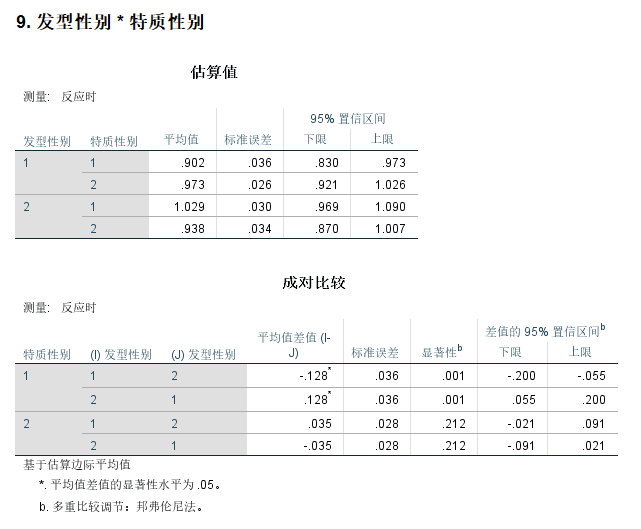


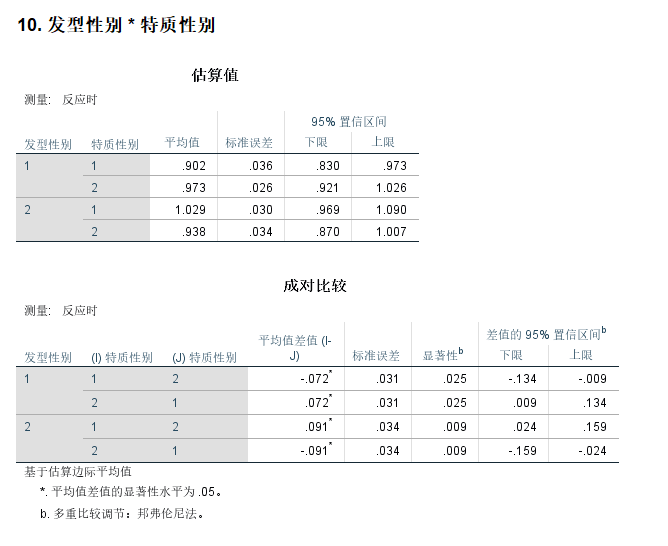

Supplement: Supplementary file 3 [file Analysis of implicit 1-2 reaction time.docx]
